# Supplementary material
Source: PubMed Central journal article supplement (PMC9995220)

# Western blots

# Figure 1c

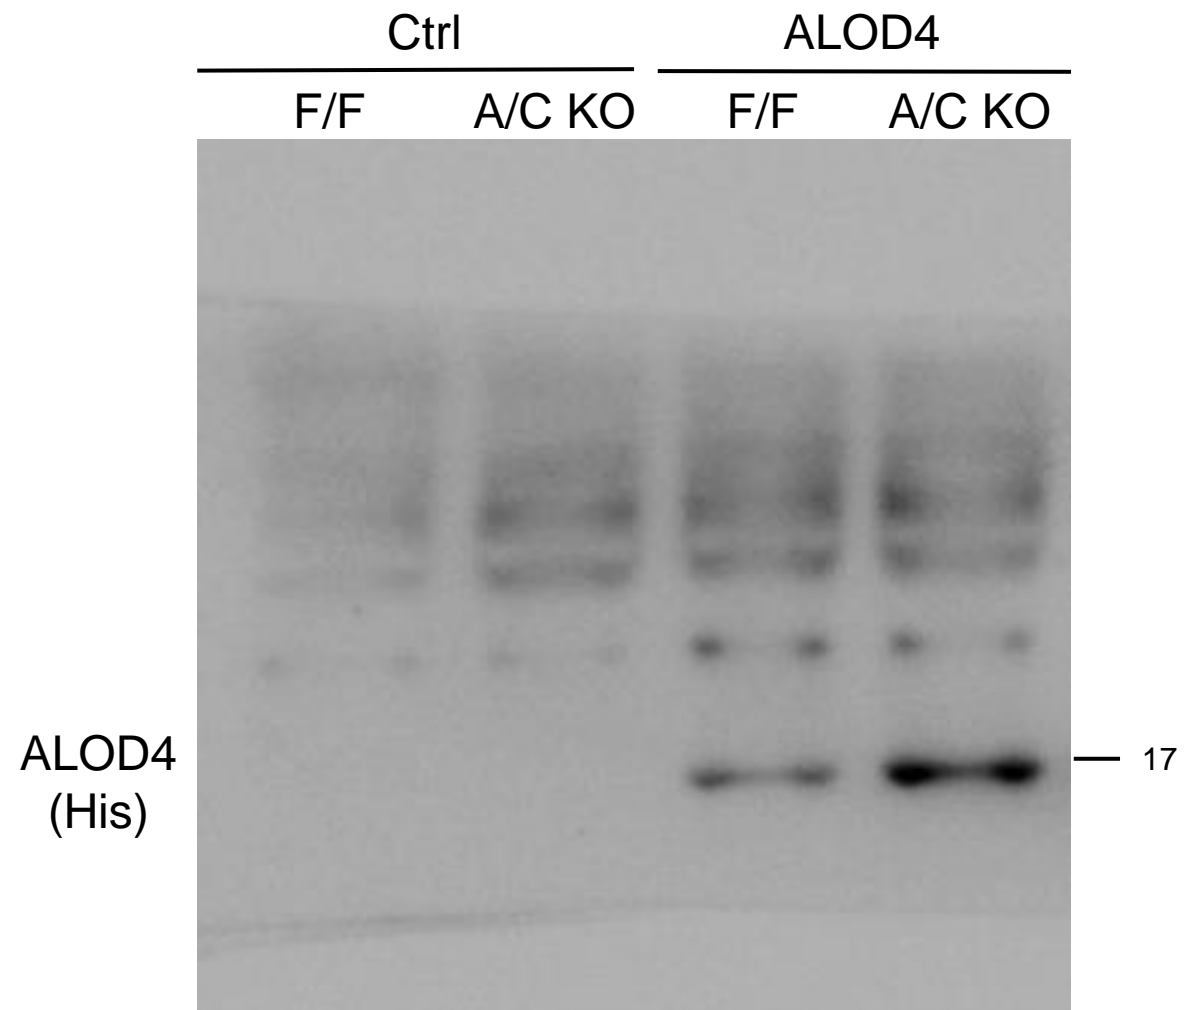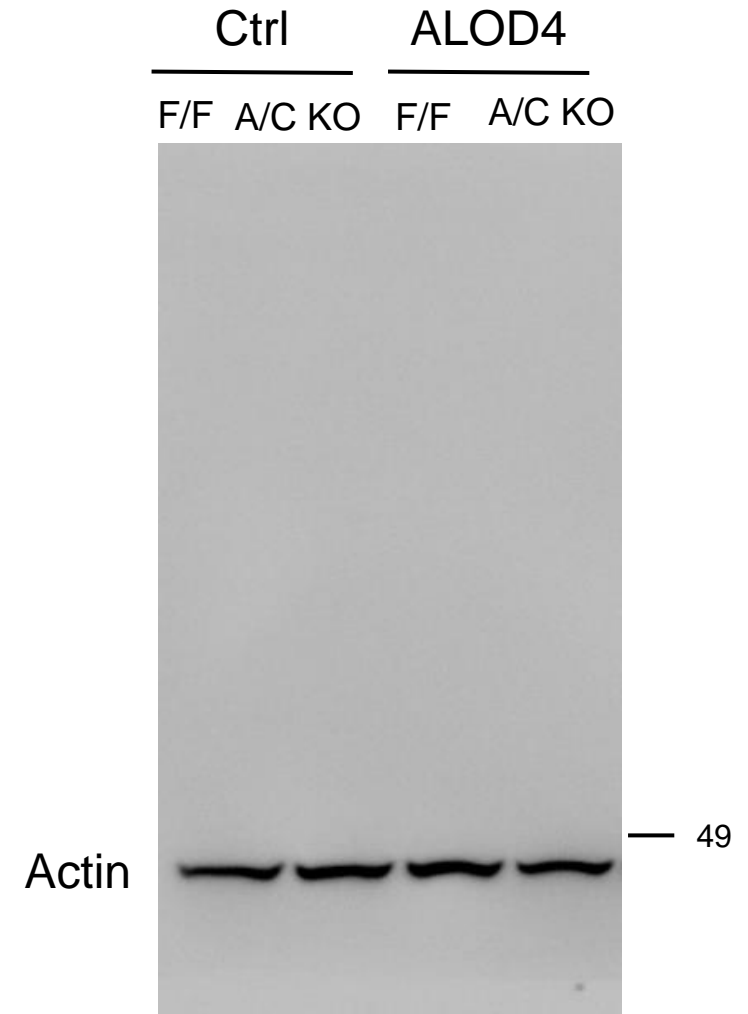

Figure 2e

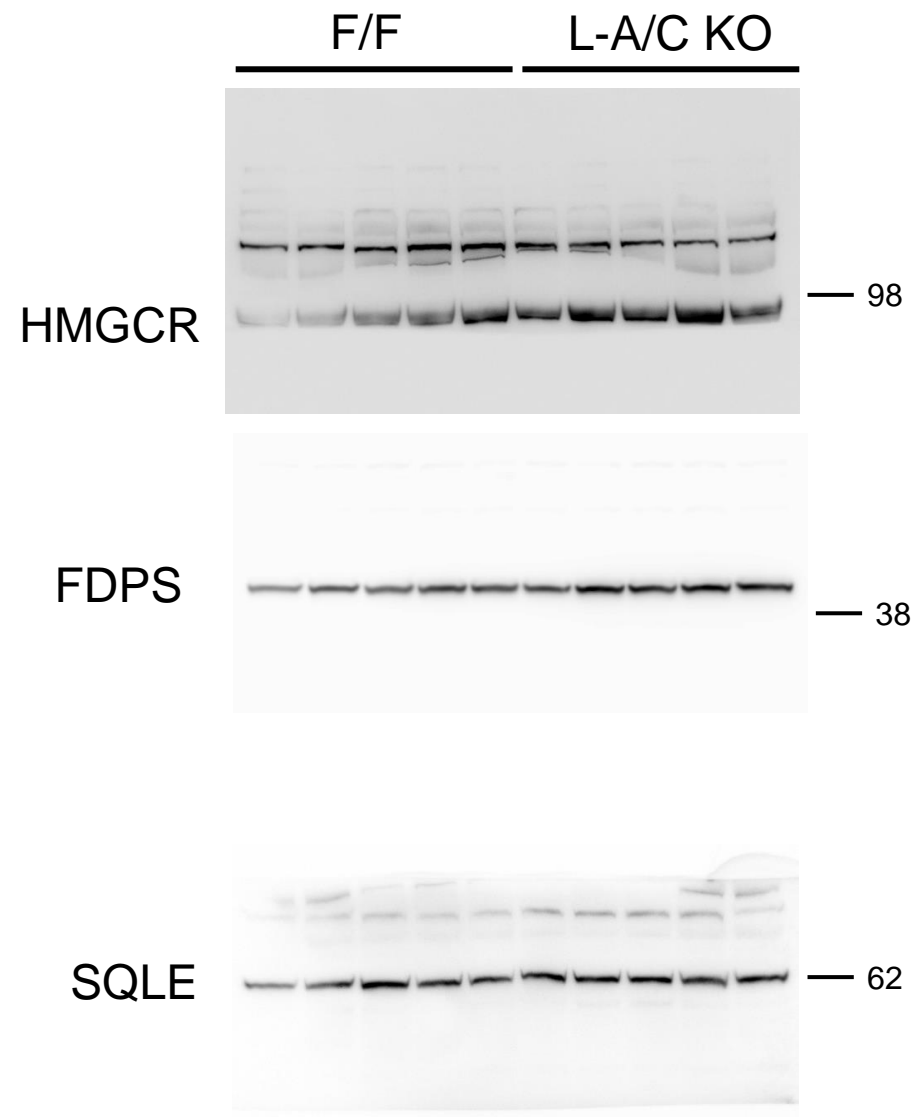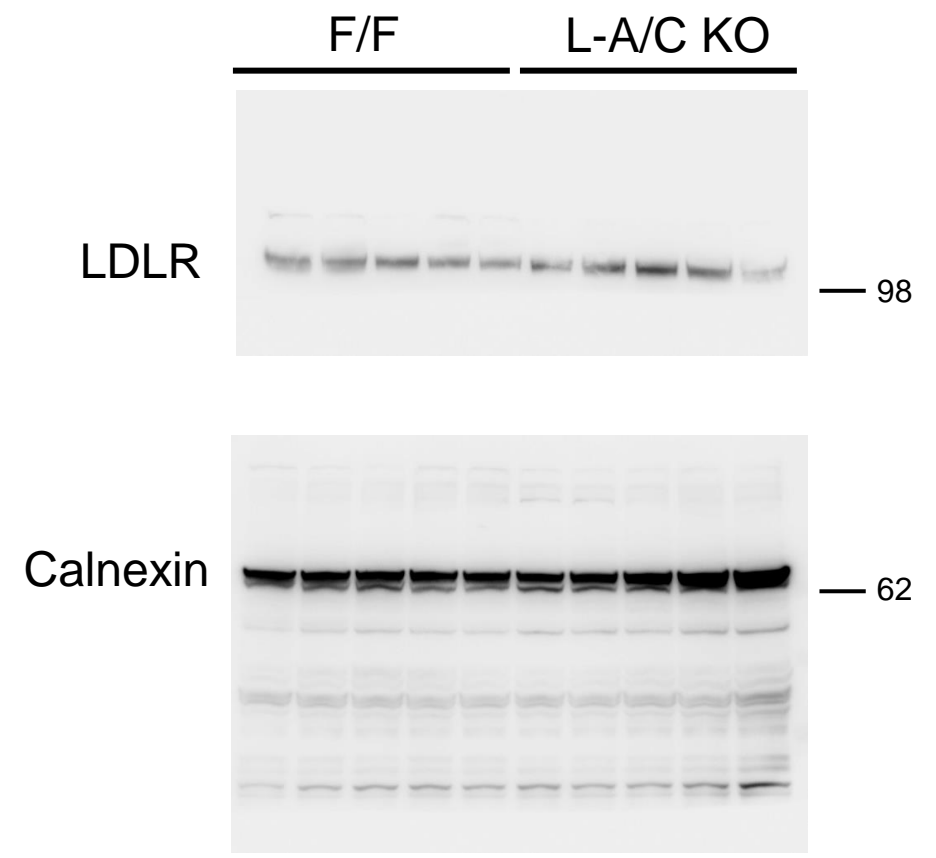

Figure 2g

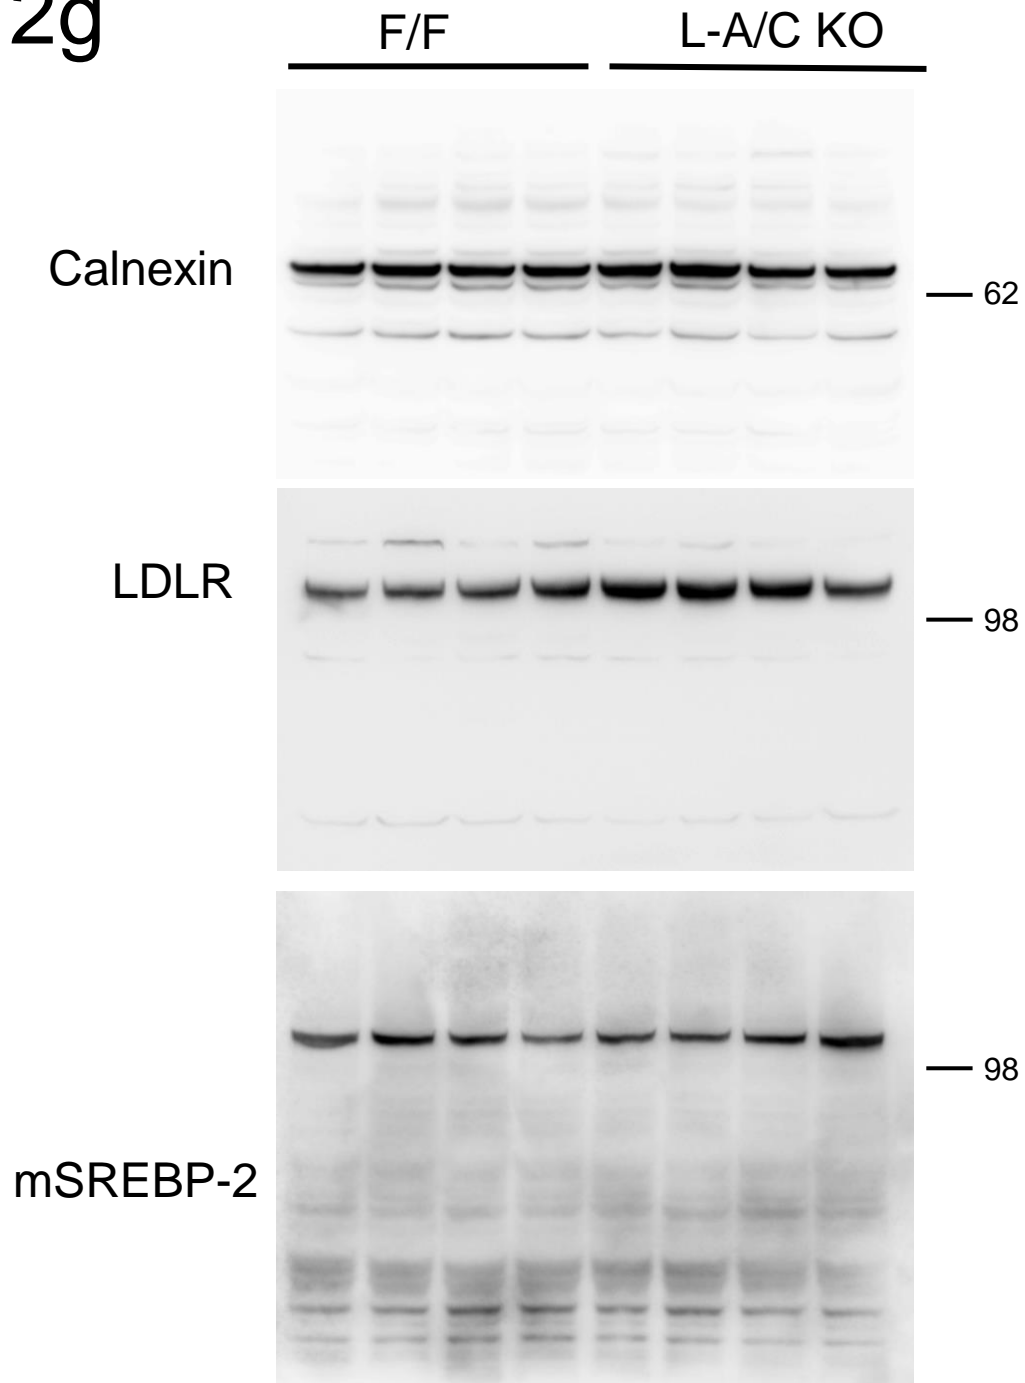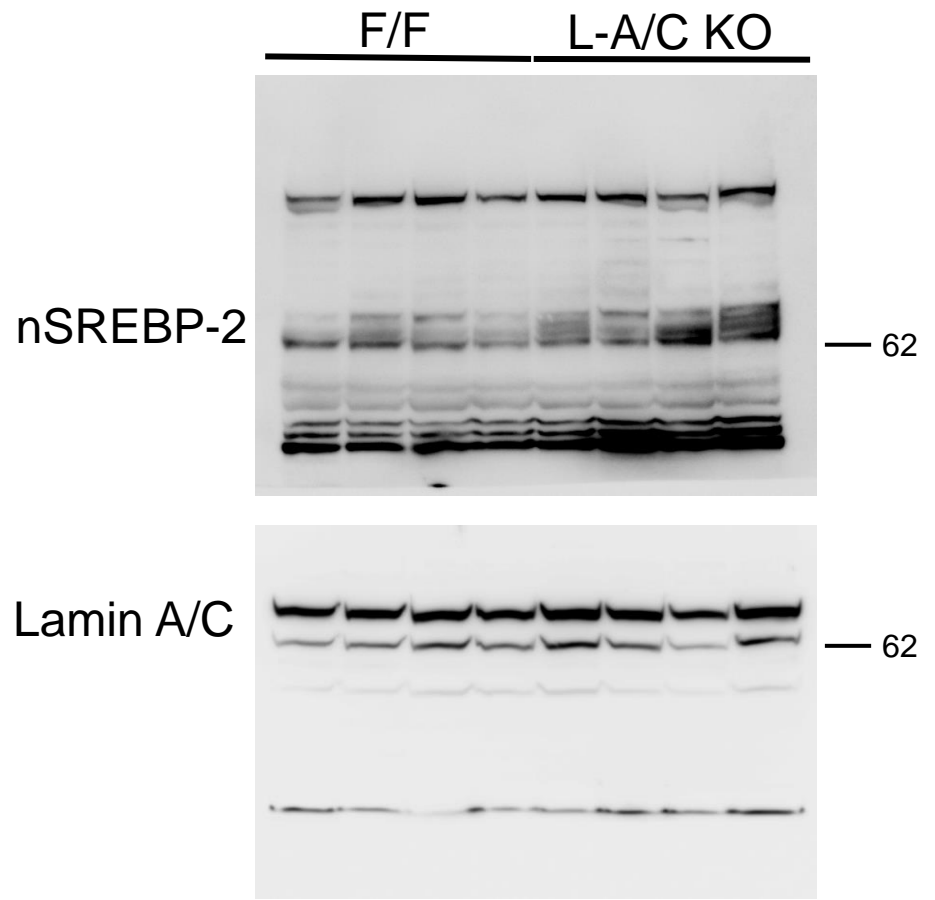

# Figure 3c

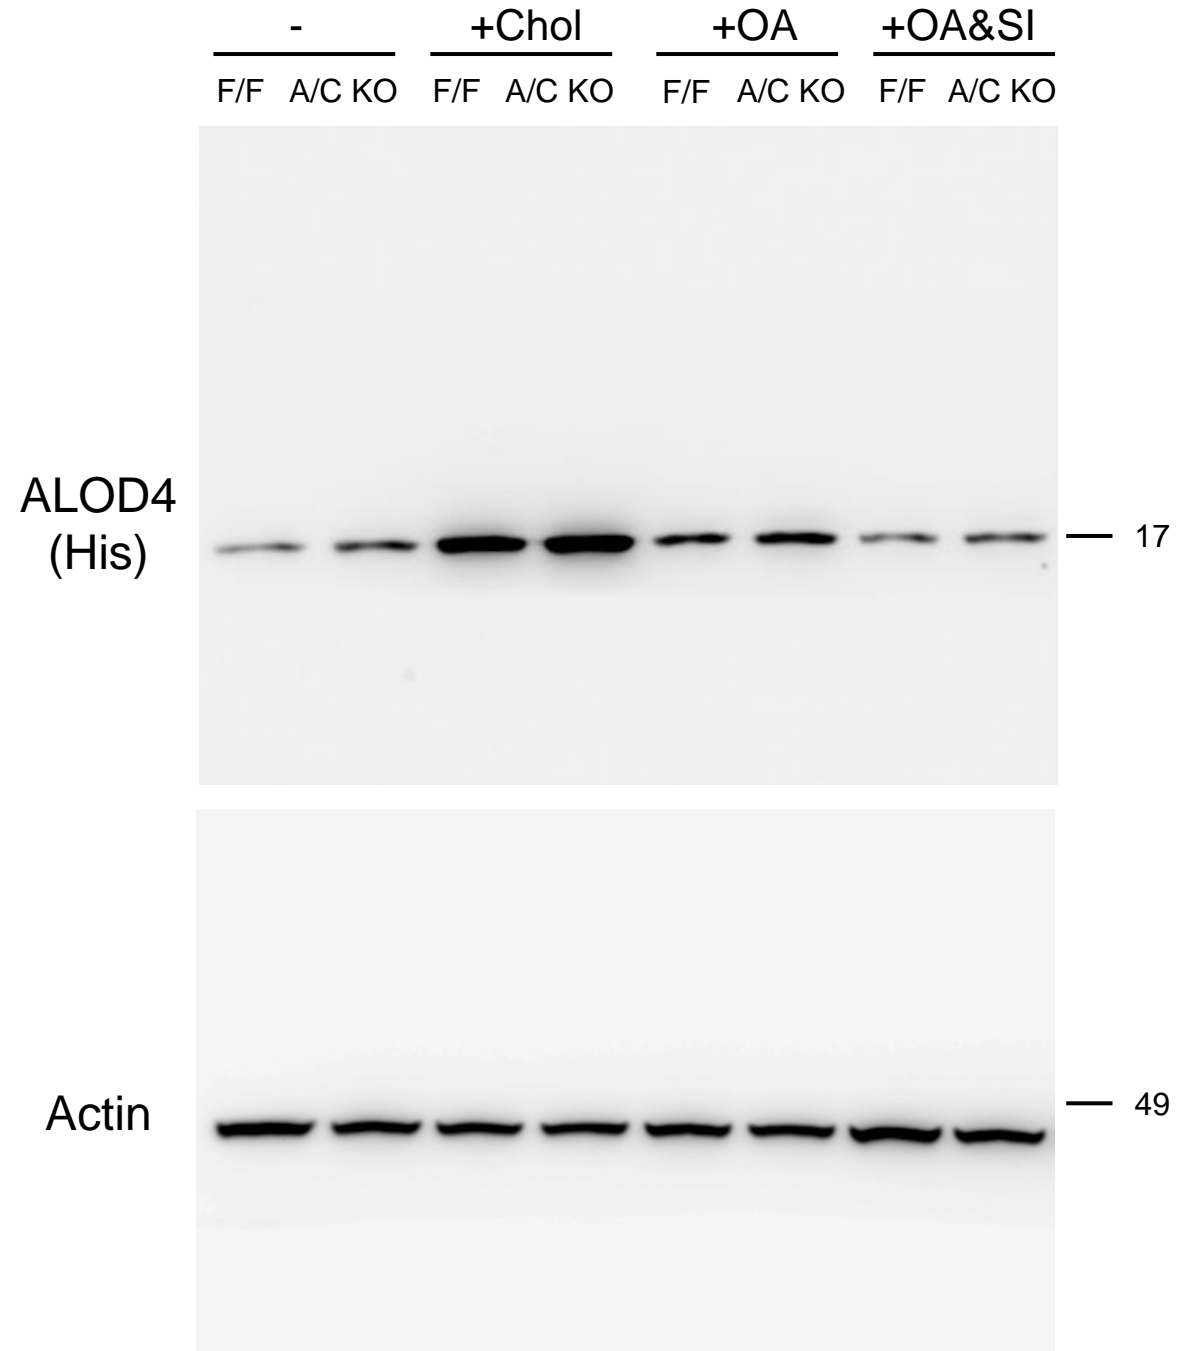

# Figure 4b

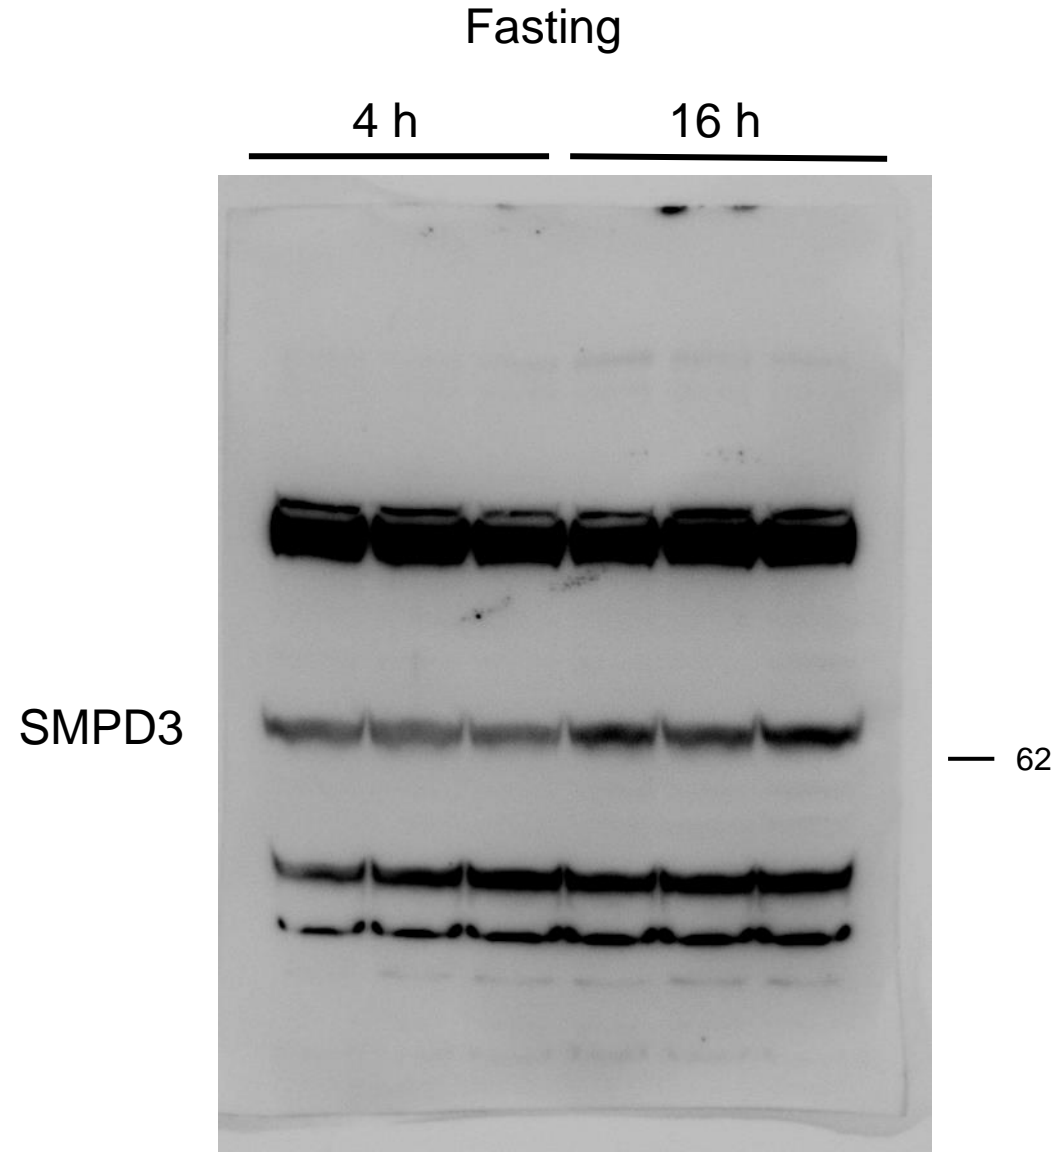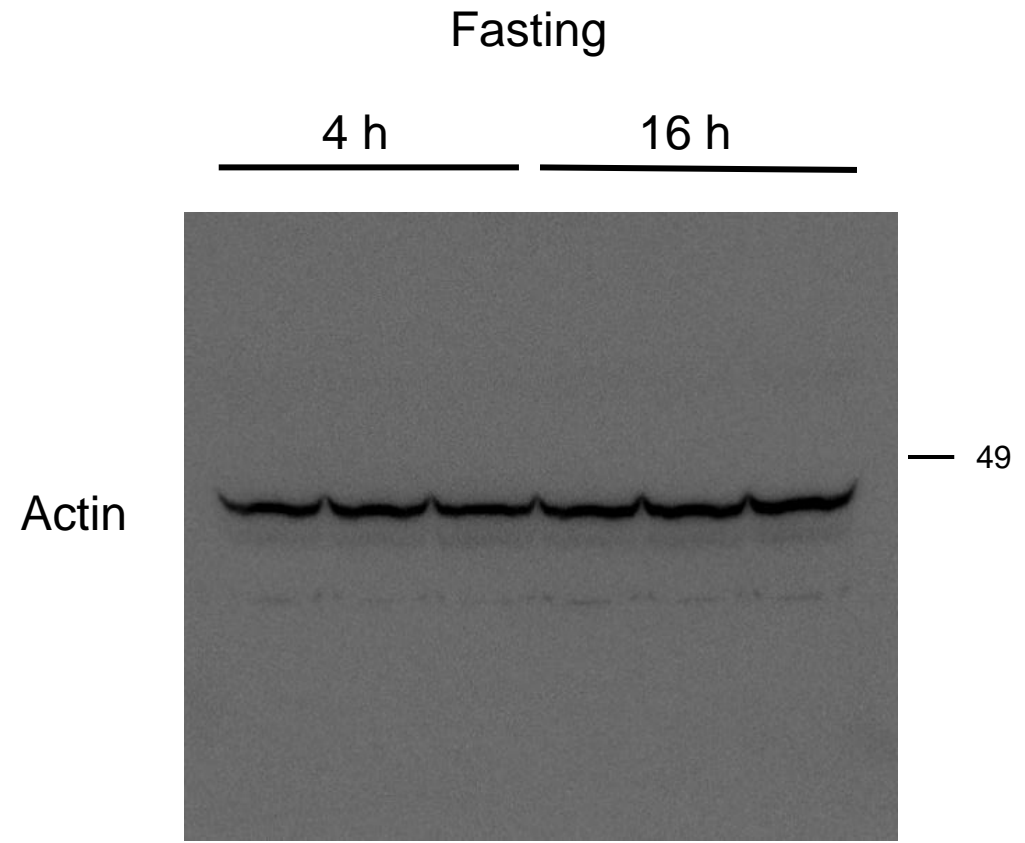

Figure 4c

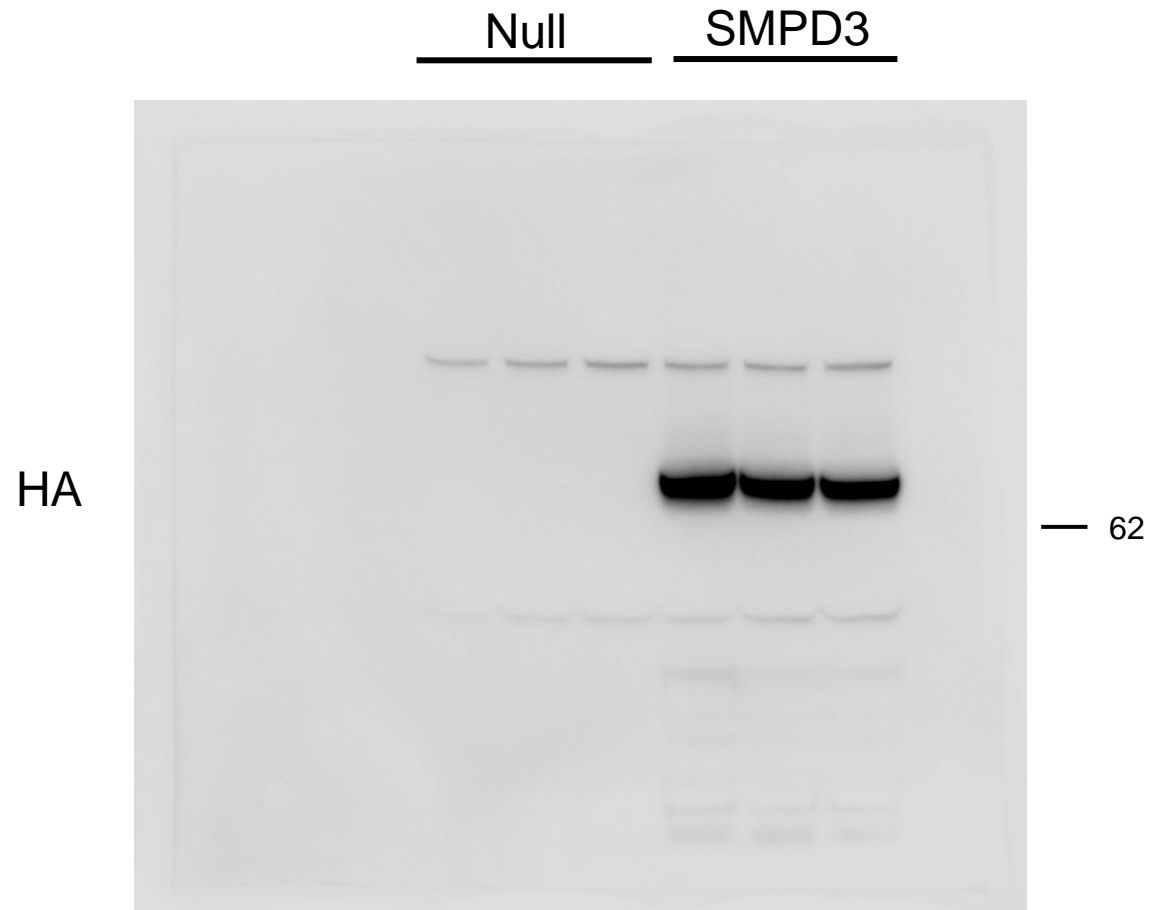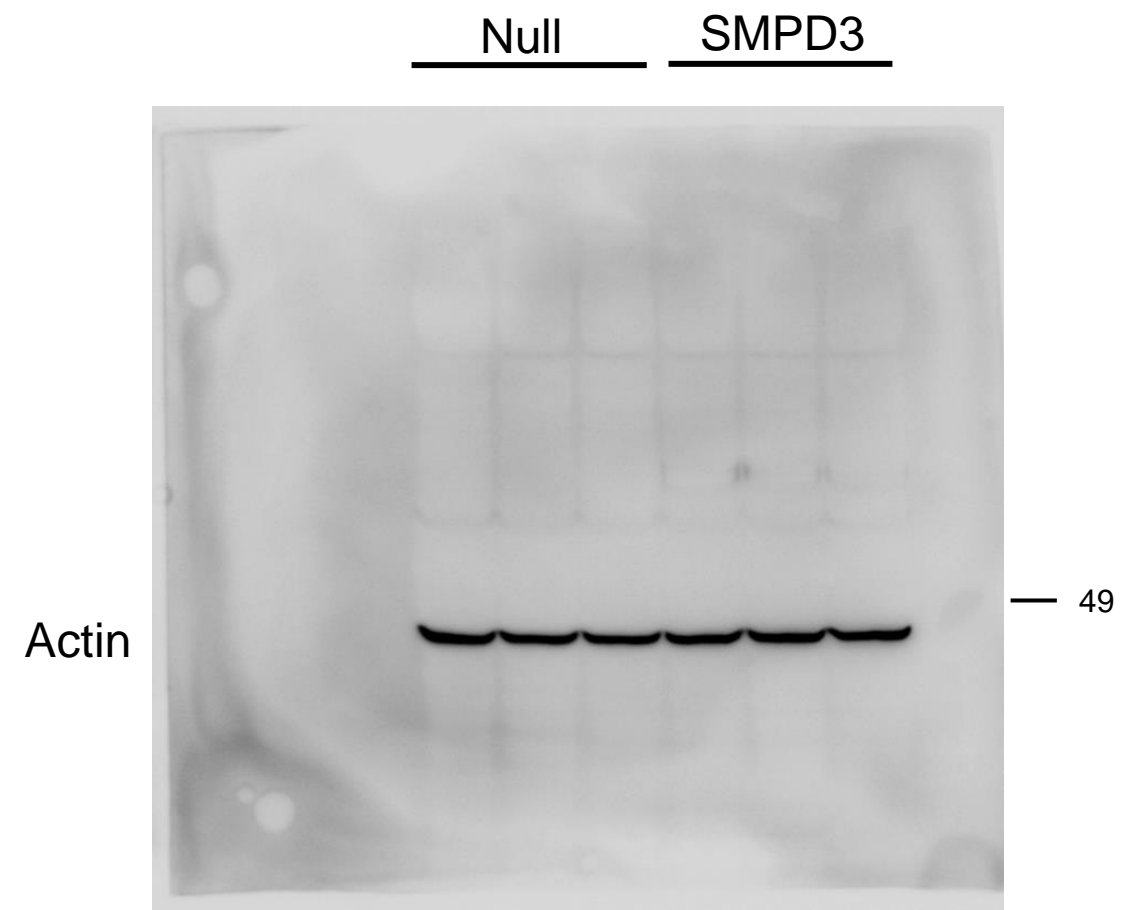





Figure 5b

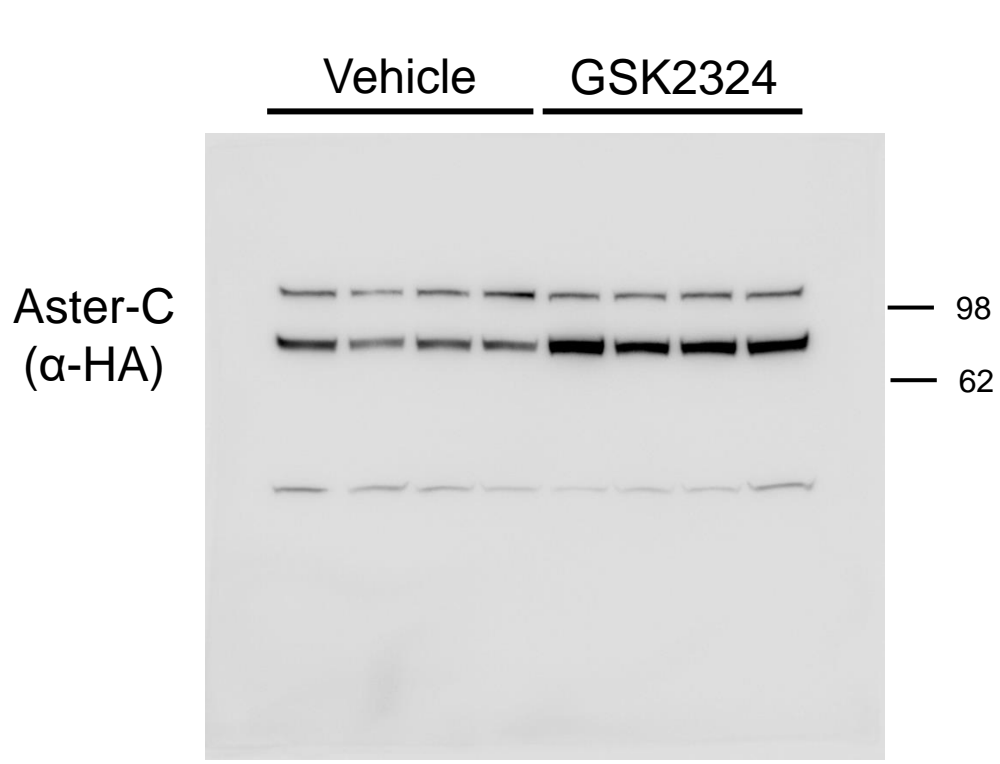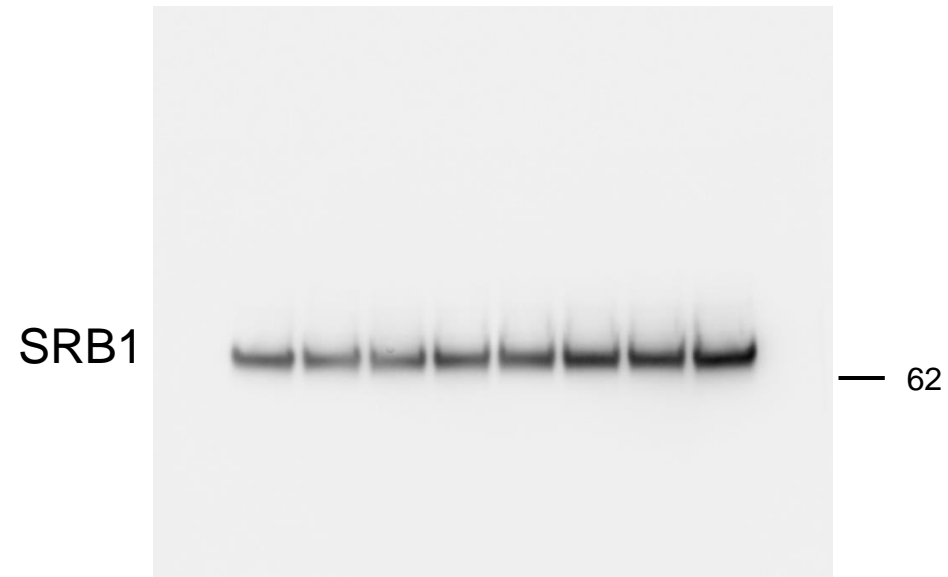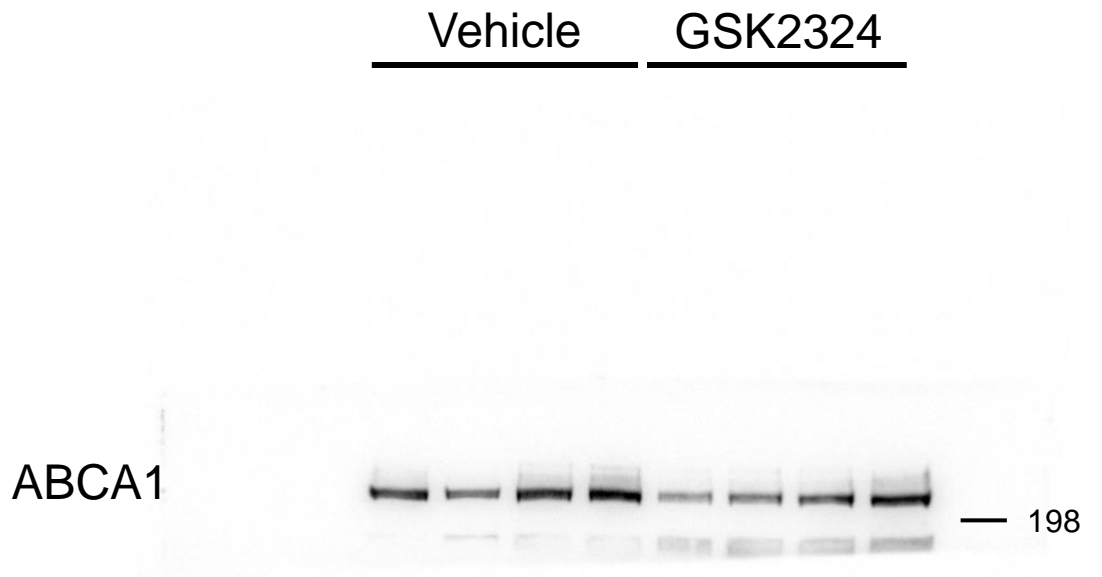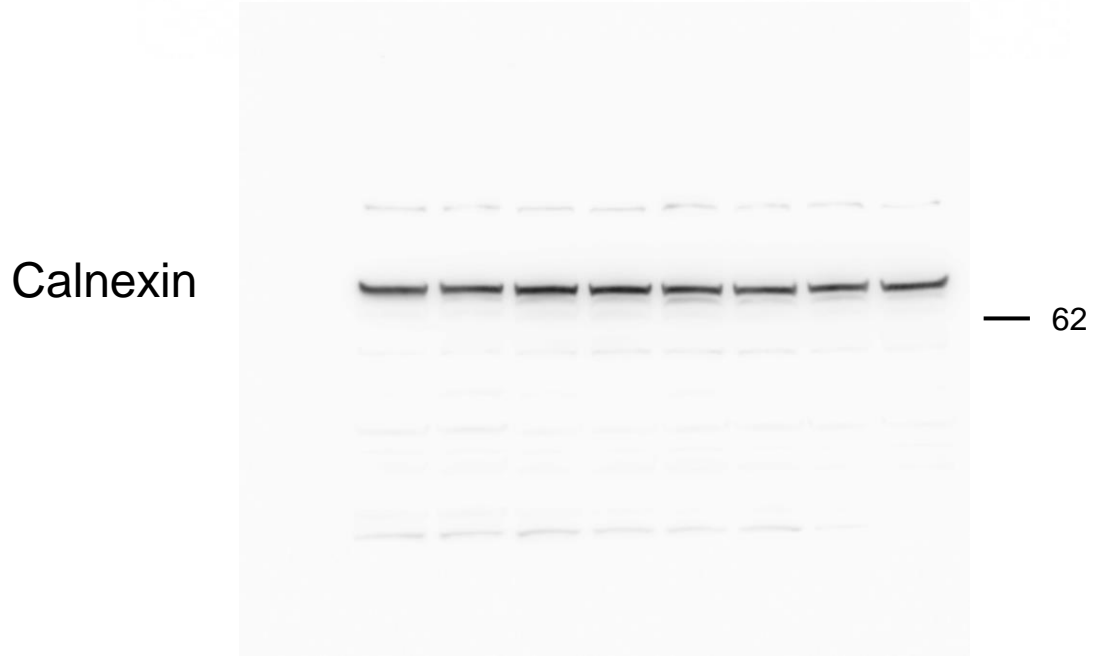

Figure 5e

GW4064 ( $\mu\text{M}$ )

0 0.03 0.1 0.3 1 3 10

Aster-C  
( $\alpha$ -HA)

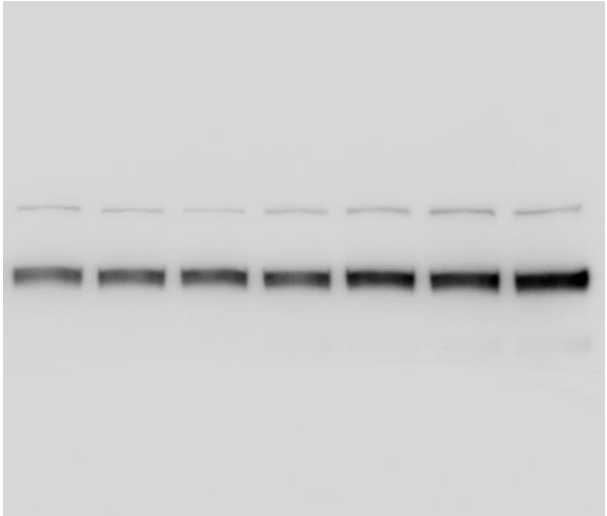

— 98  
— 62

SR-BI

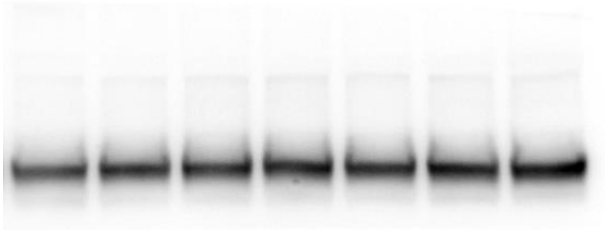

— 62

Actin

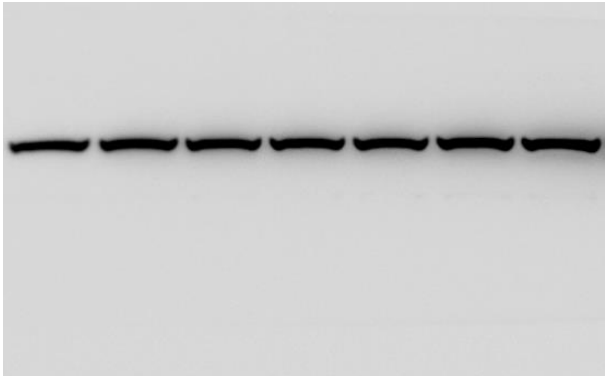

— 49

Figure 8c

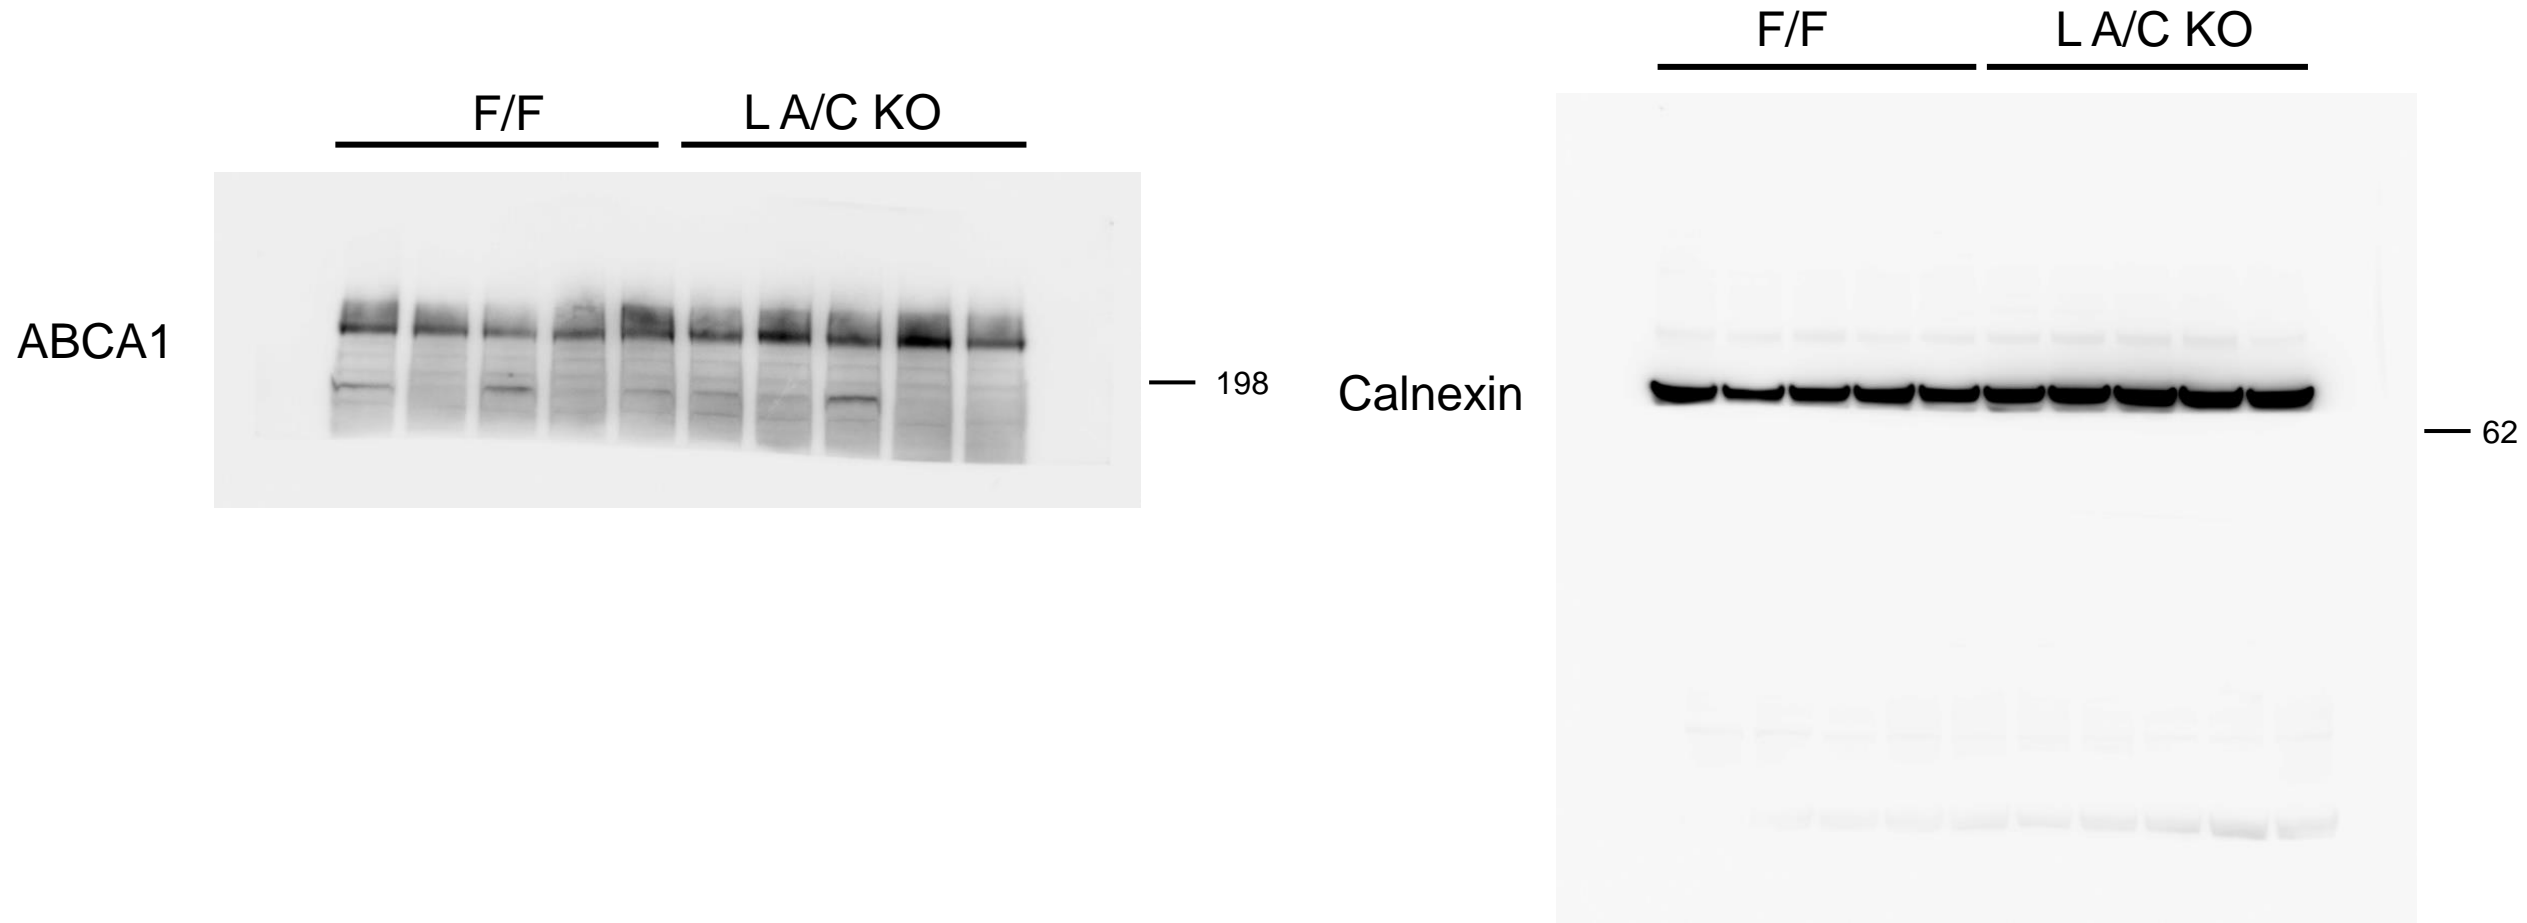

Extended Data  
Figure 1b

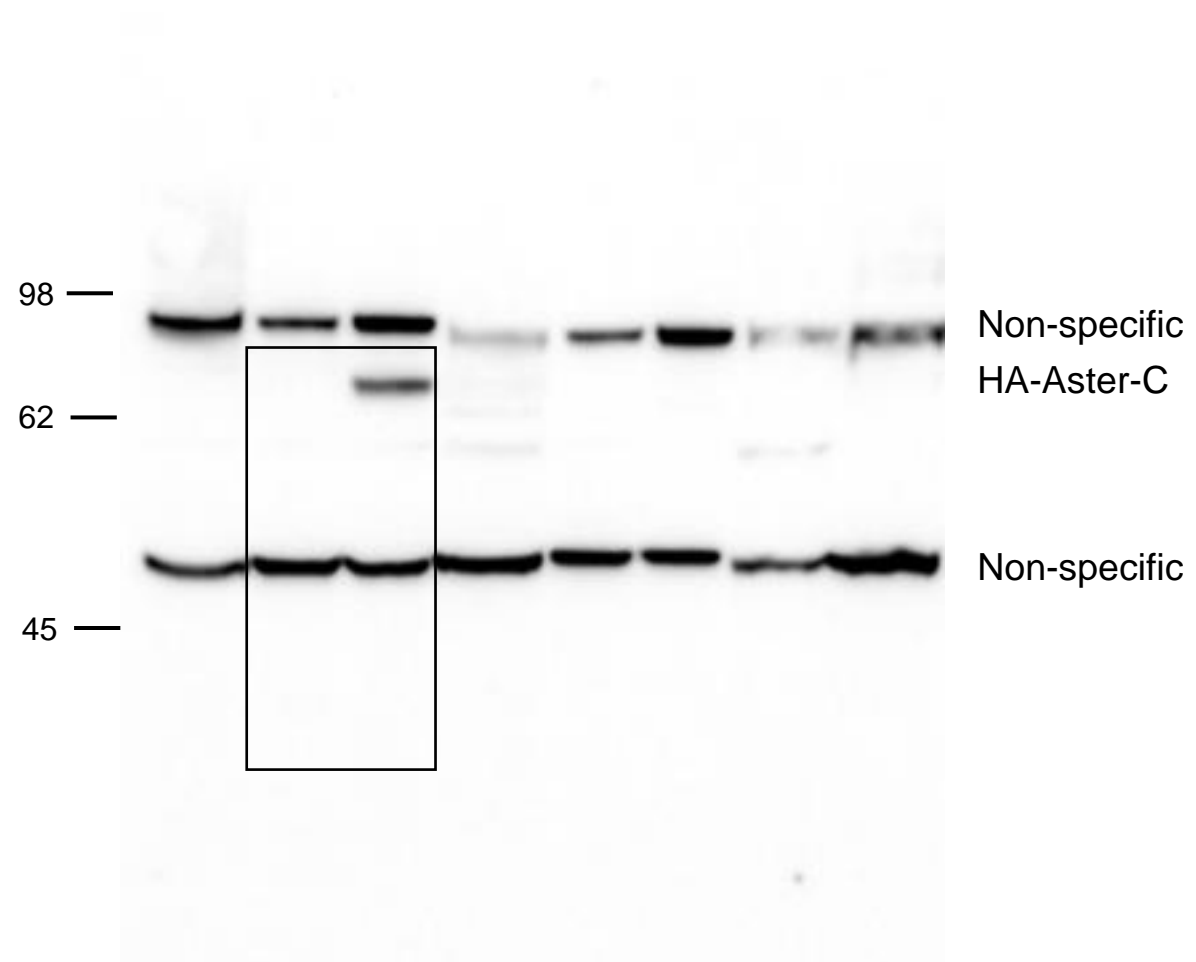

Extended Data  
Figure 2g

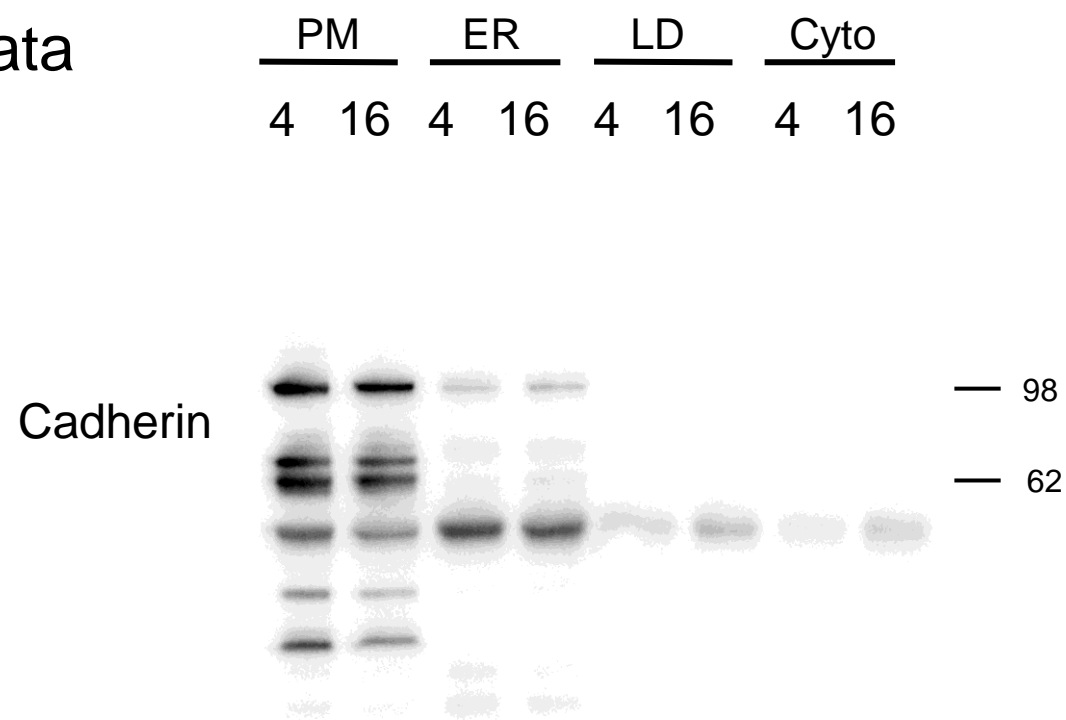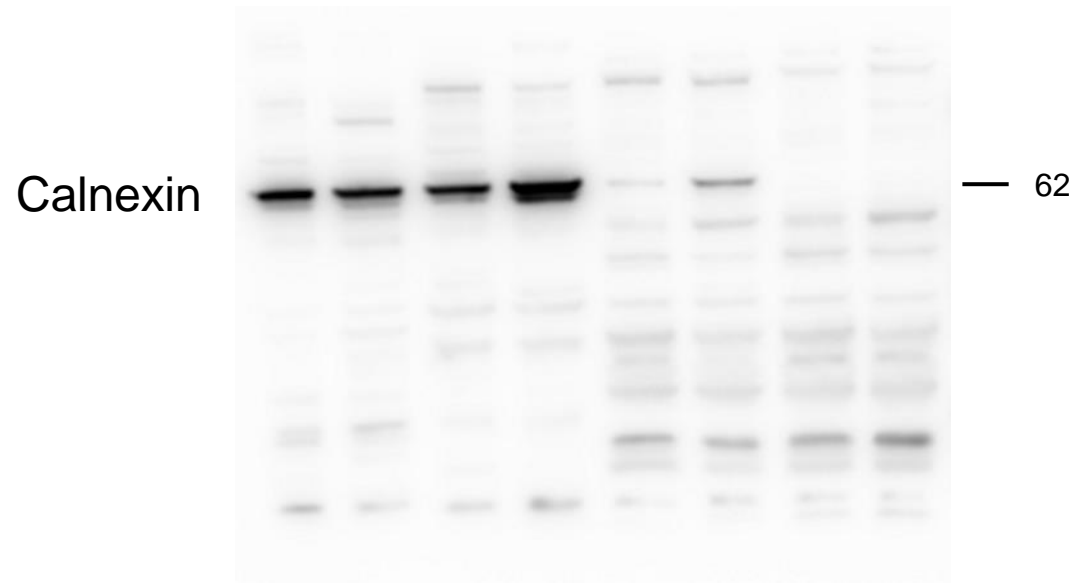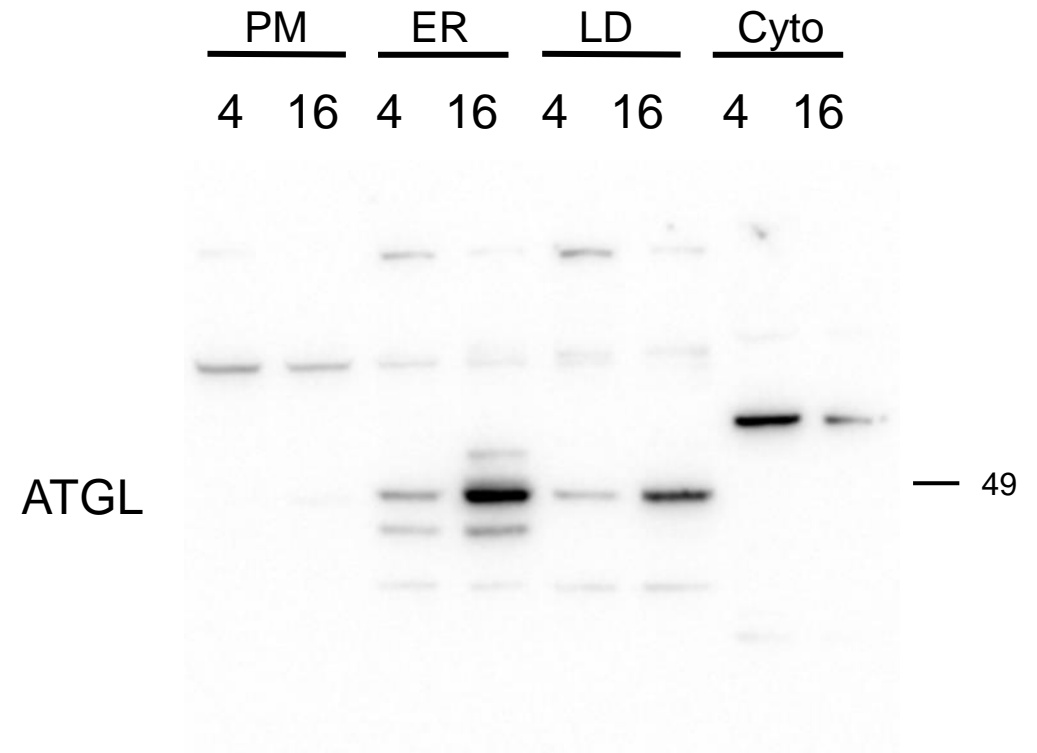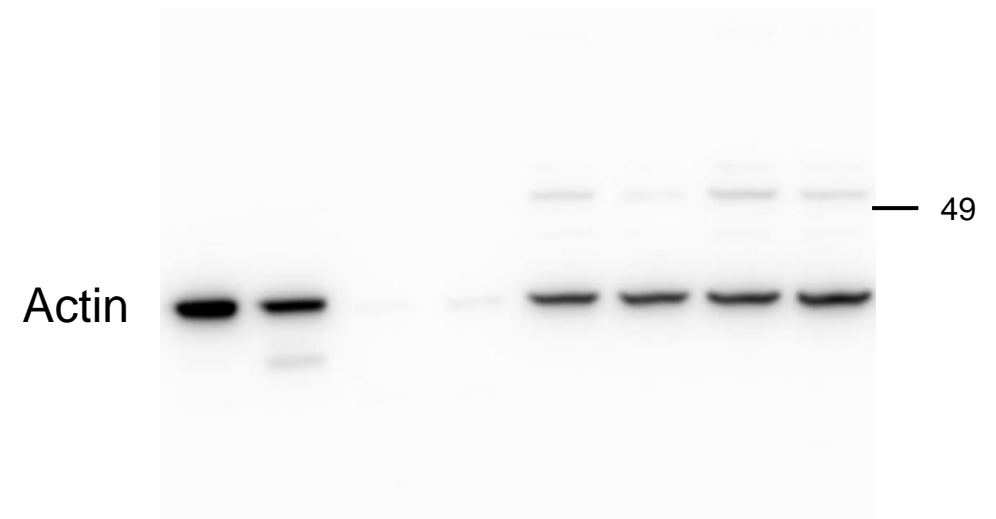

# Extended Data Figure 3b

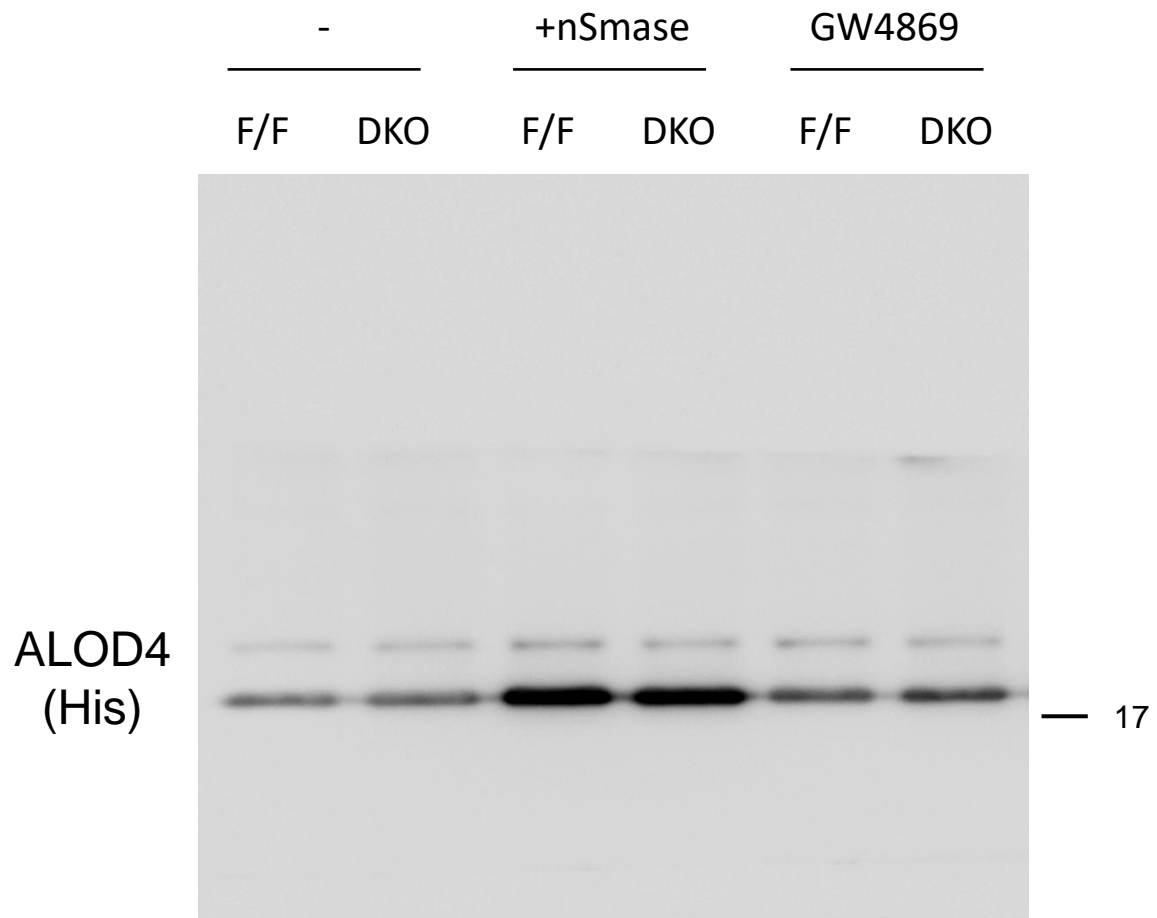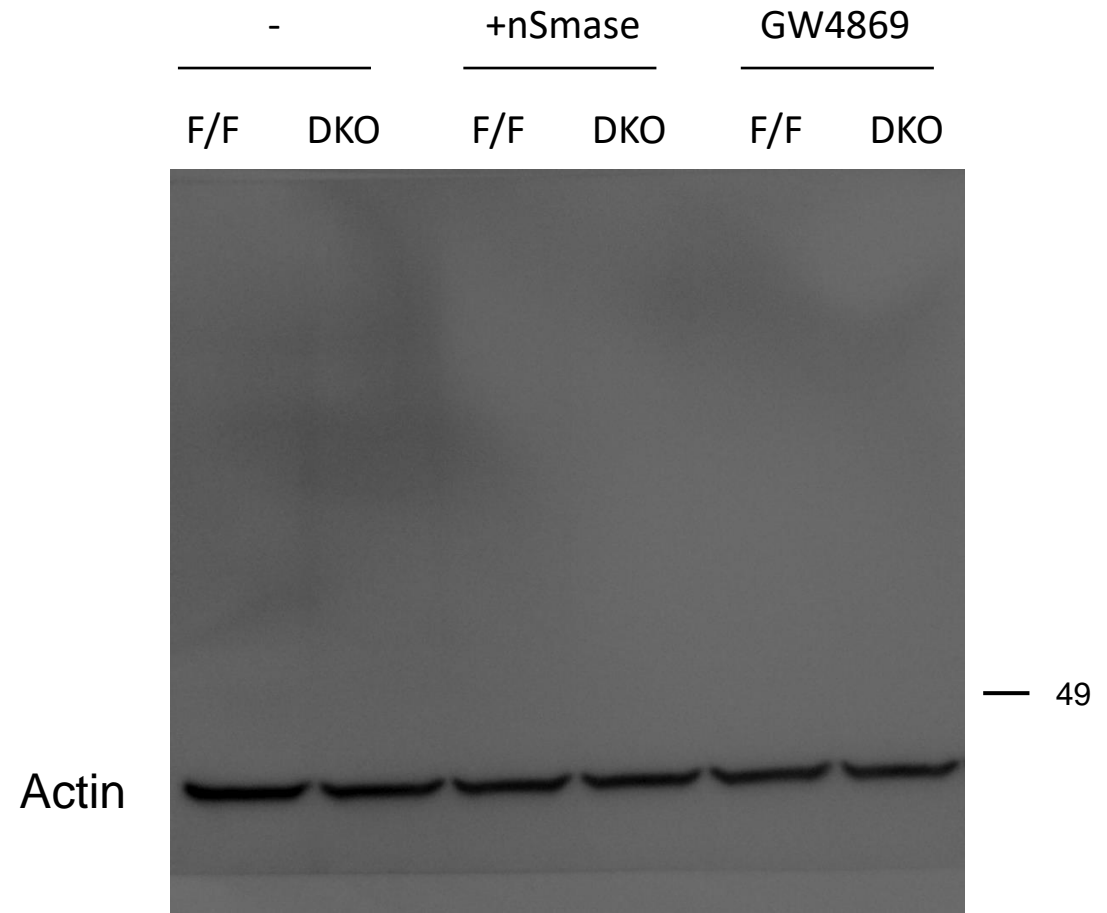

Extended Data  
Figure 3d

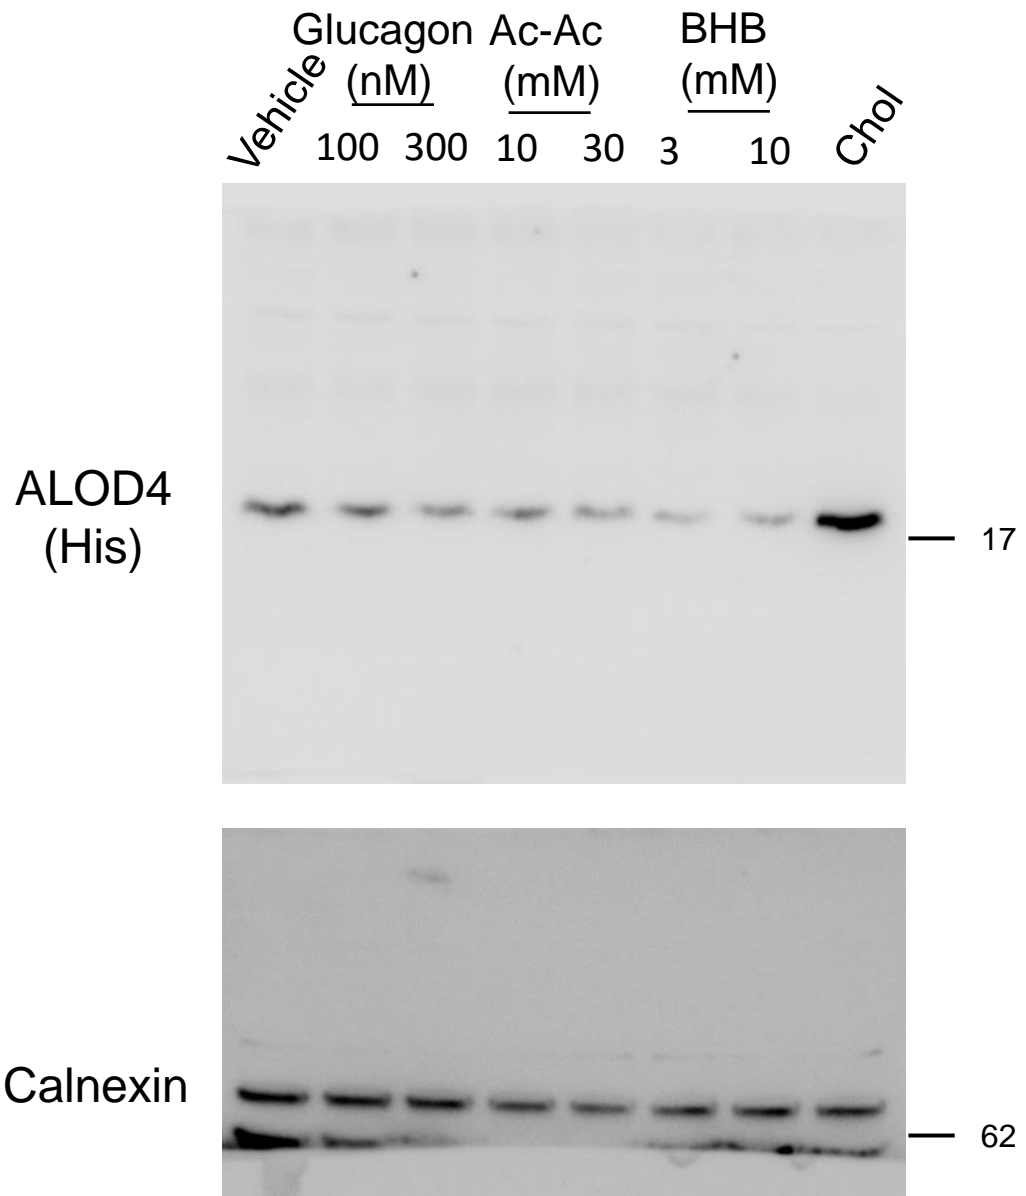

Extended Data  
Figure 3e

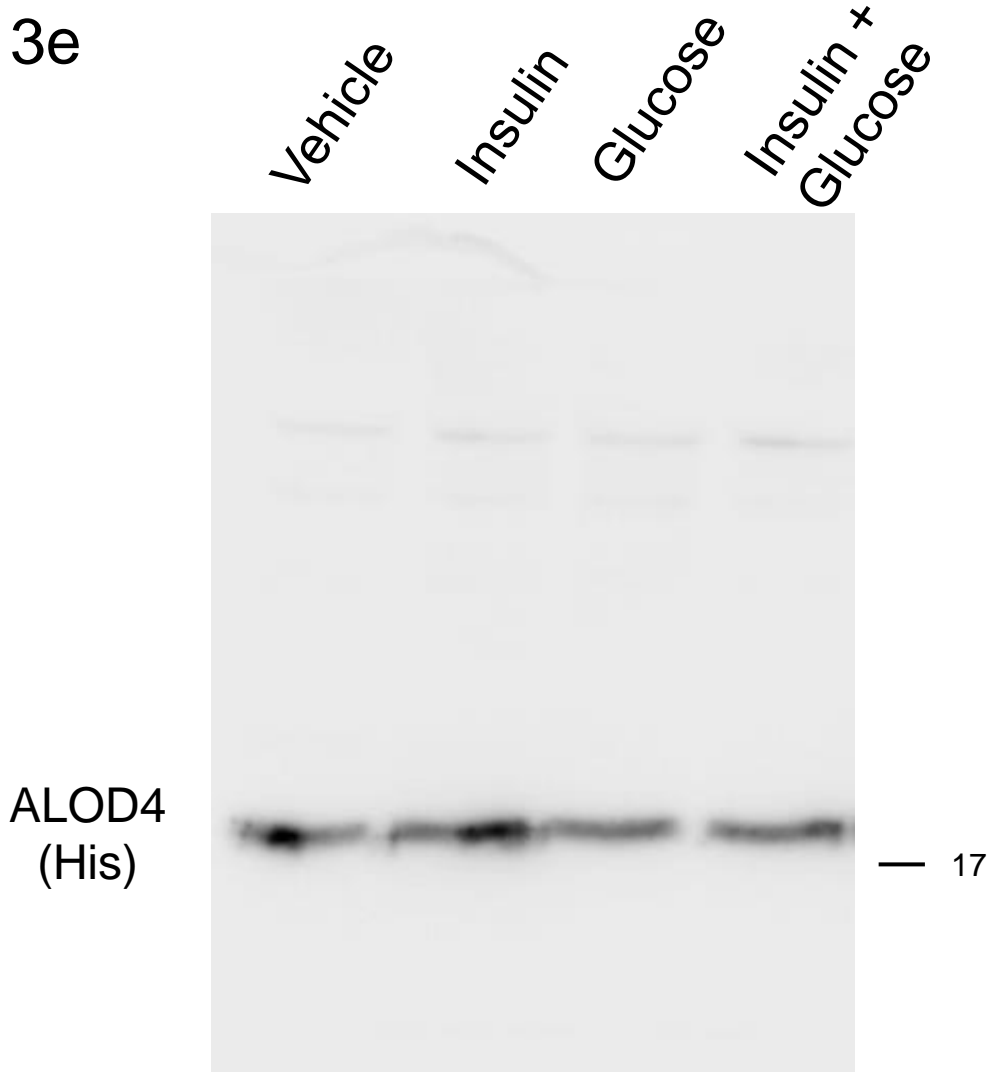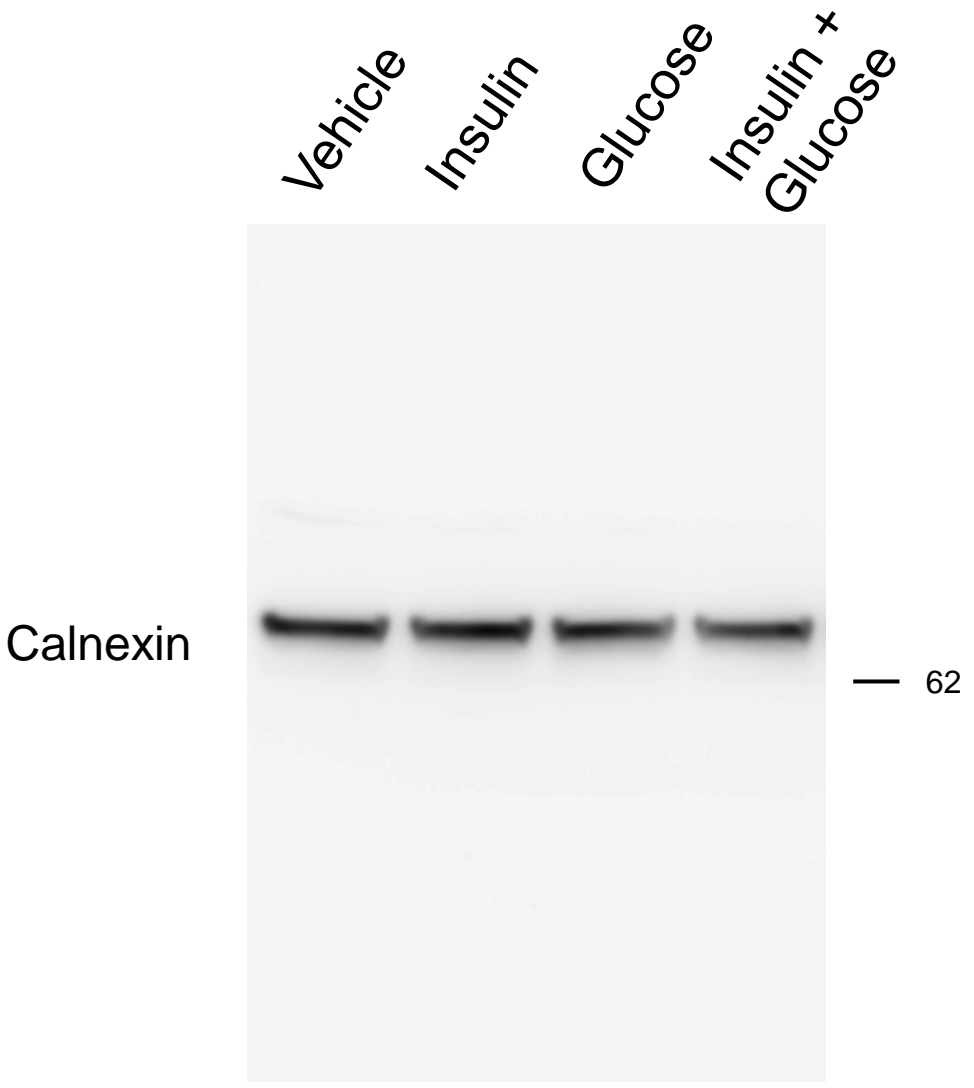



Extended Data  
Figure 4a

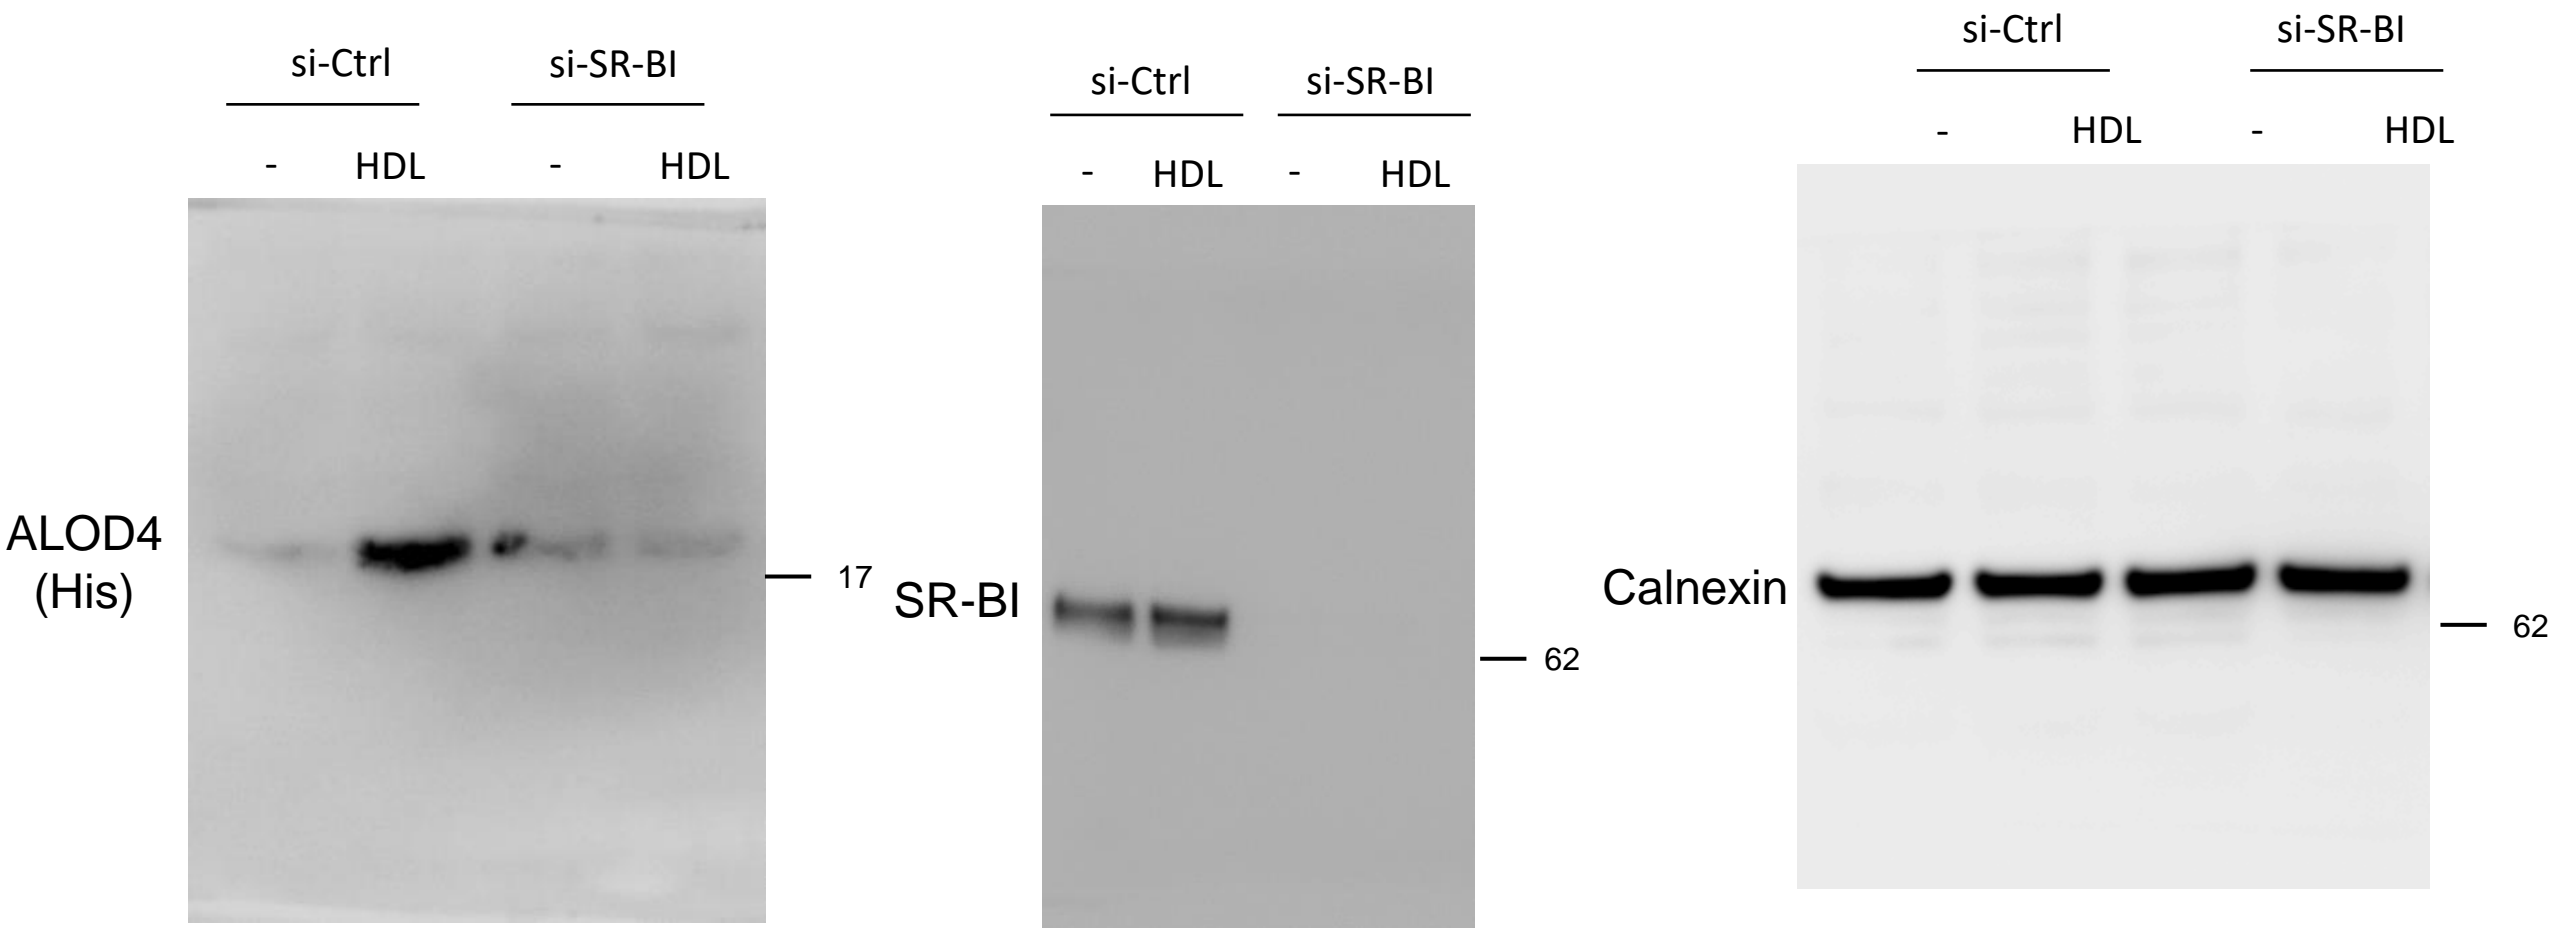

DNA gels

Extended Data  
Figure 1b

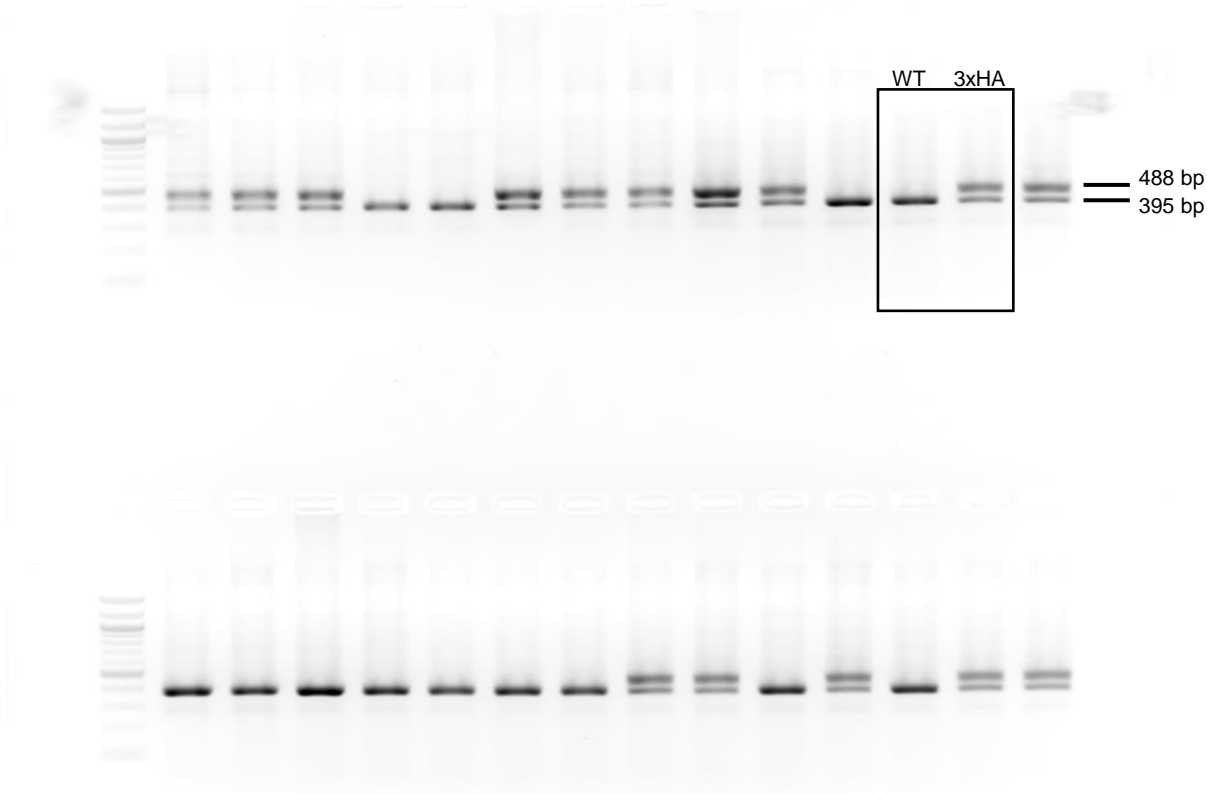

# Extended Data Figure 1d

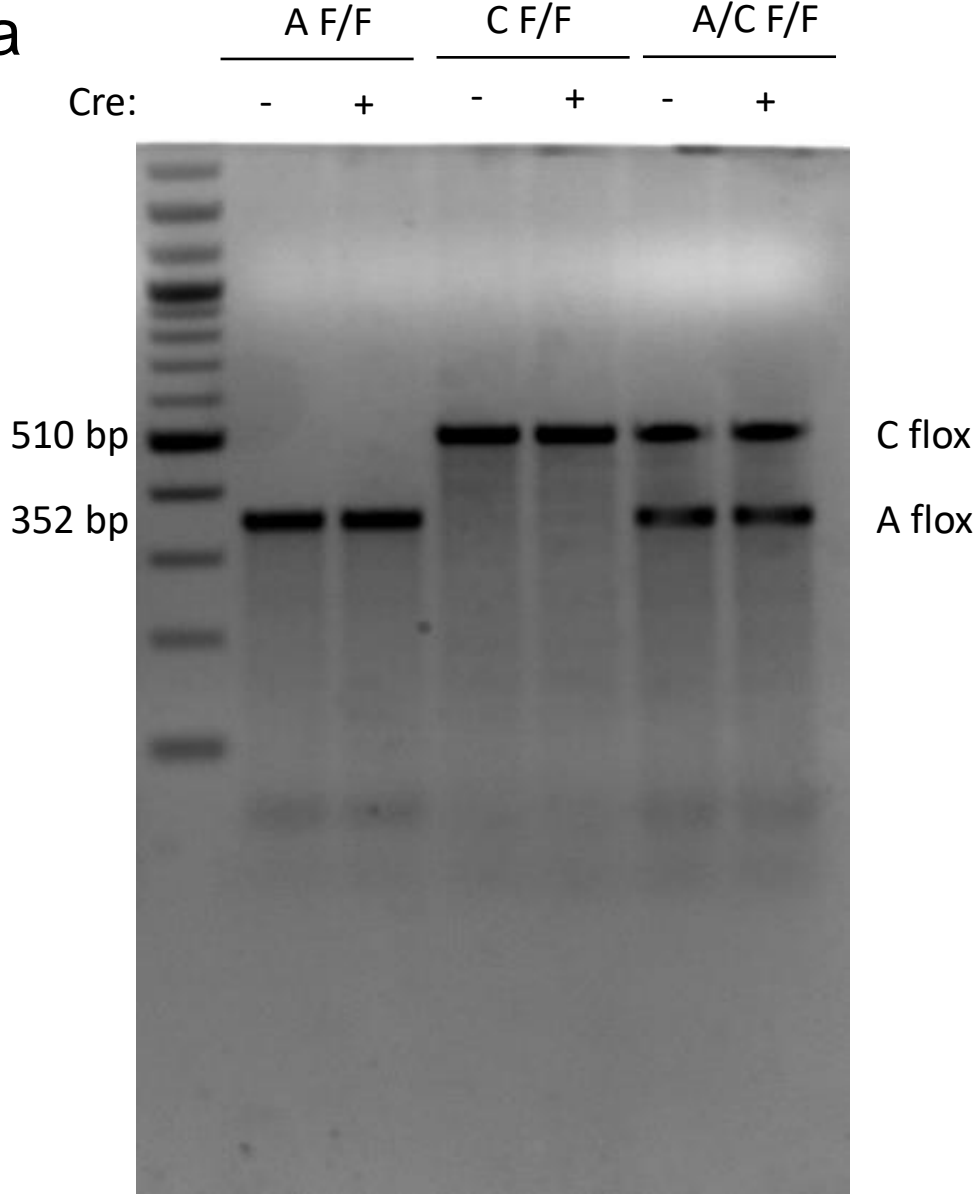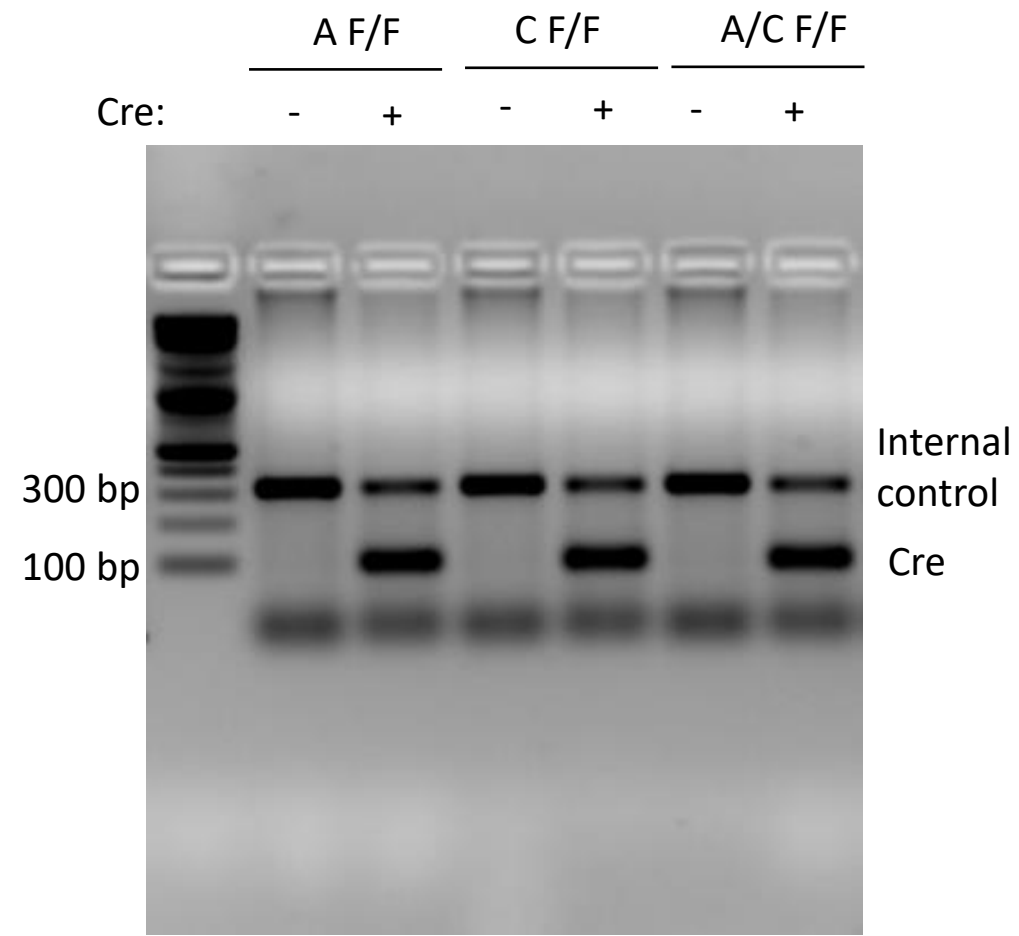

# Microscopy

Figure 1a

Vehicle

+Cholesterol

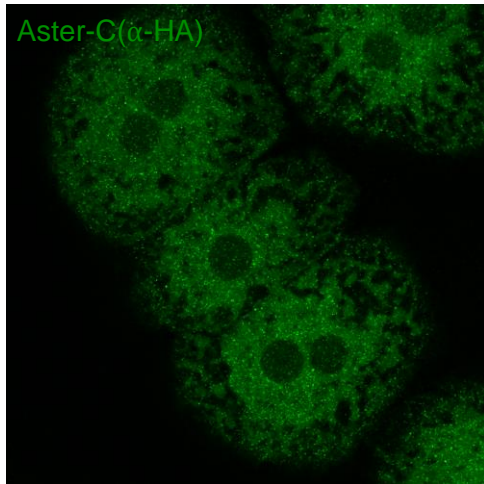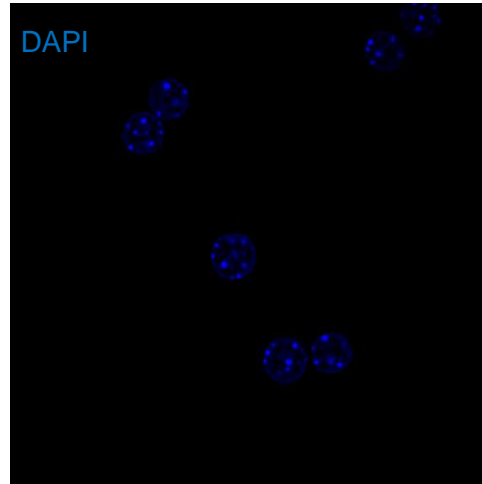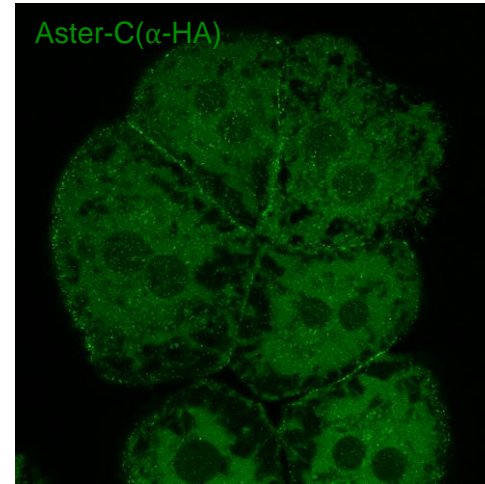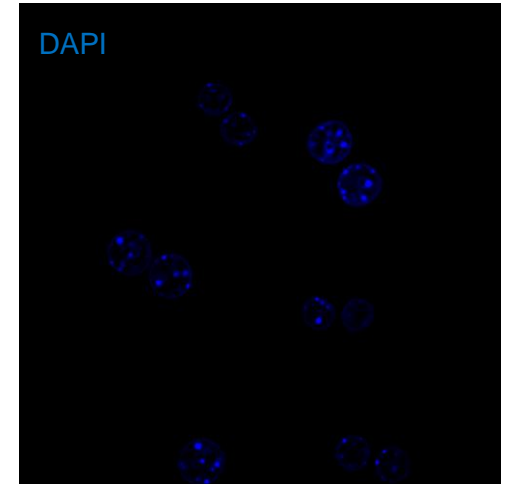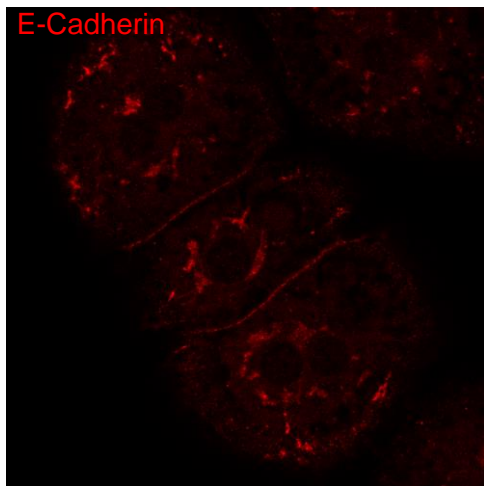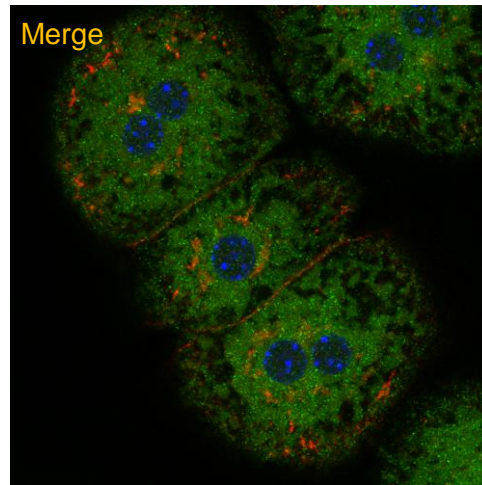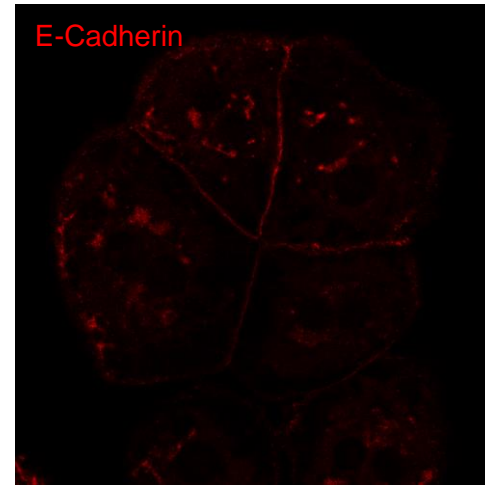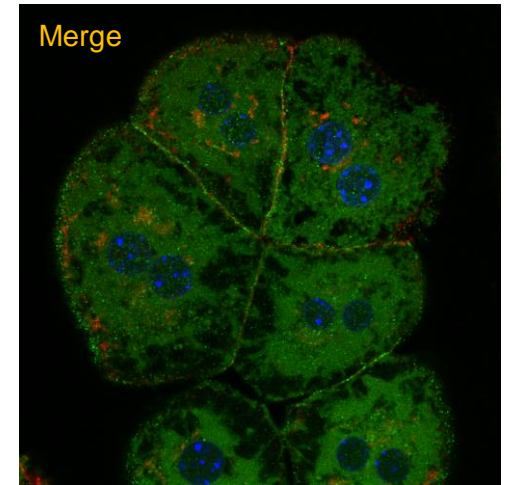

Figure 1a

F/F

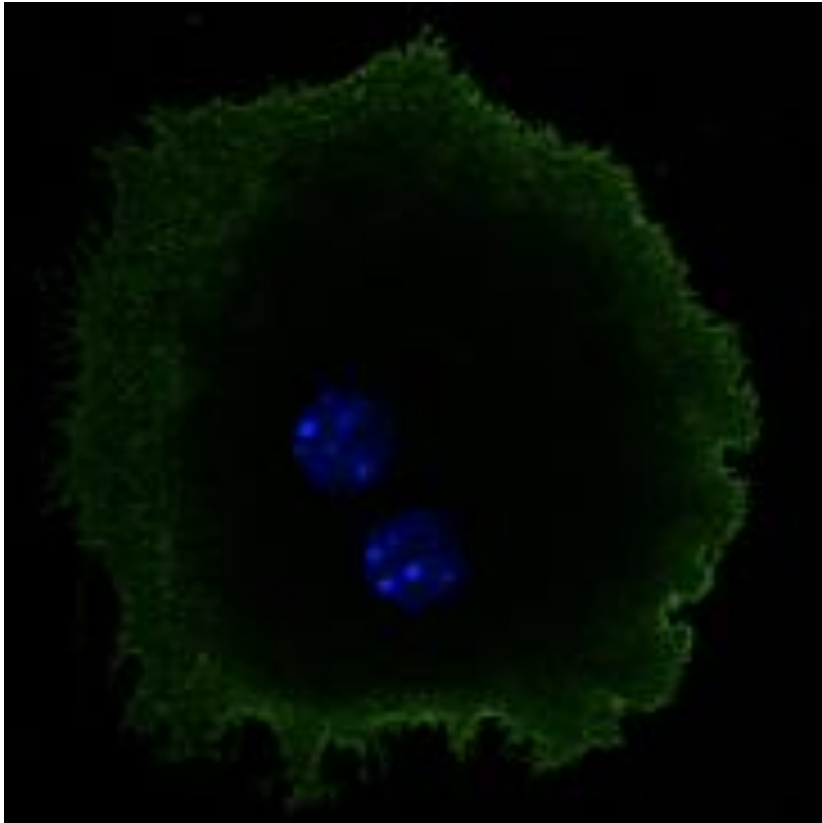

L-A/C KO

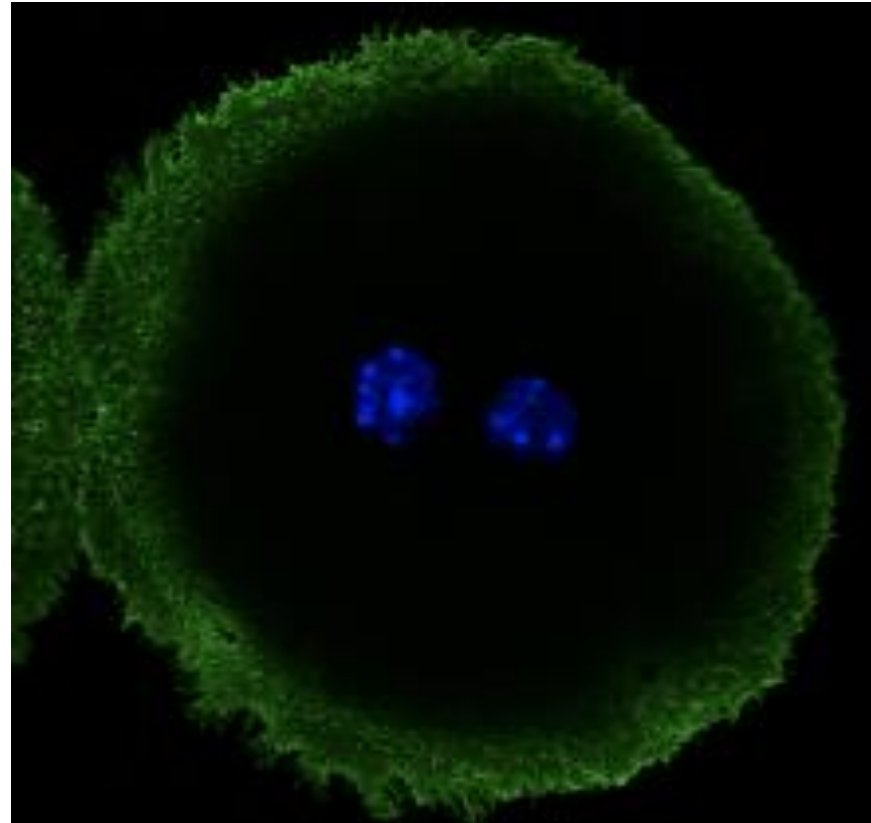

Figure 8f

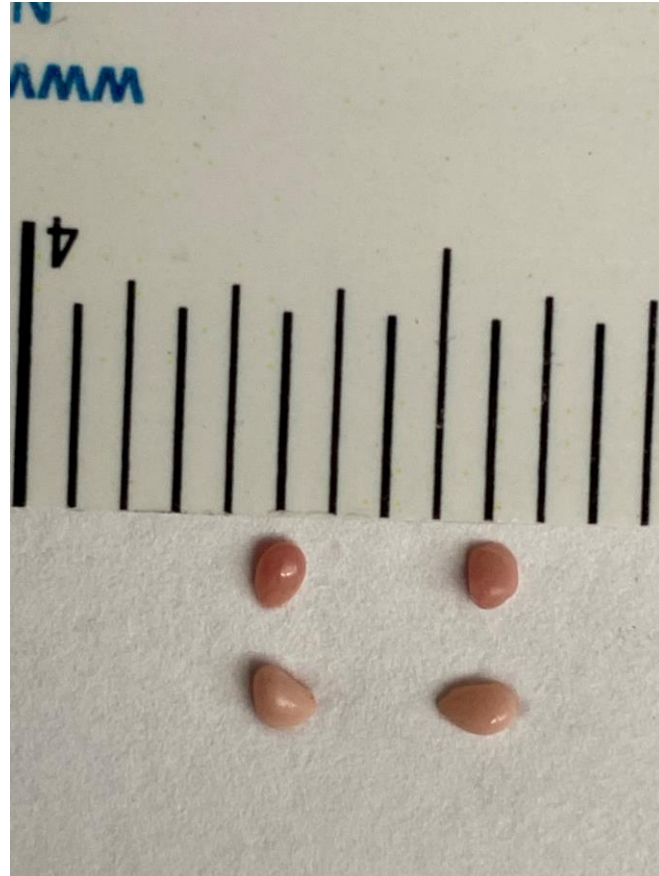



Figure 8g

F/F

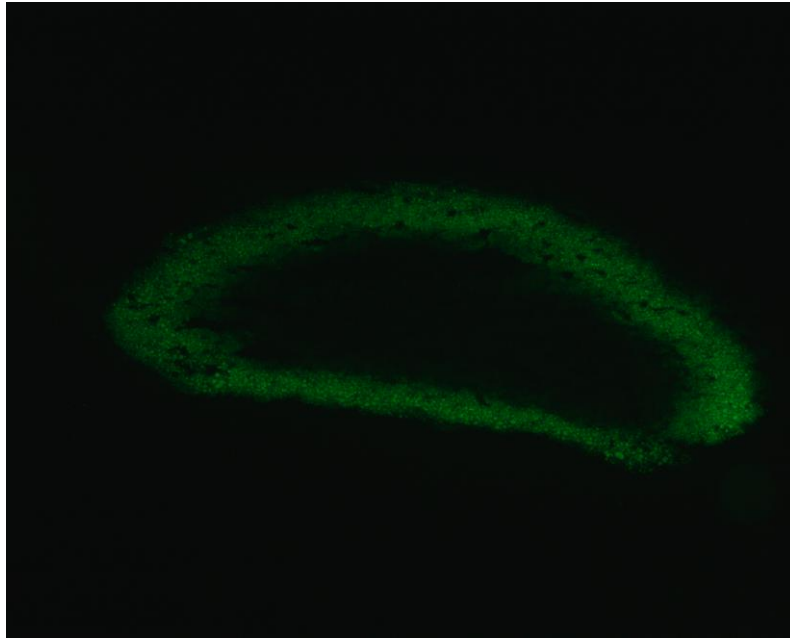

L-A/C KO

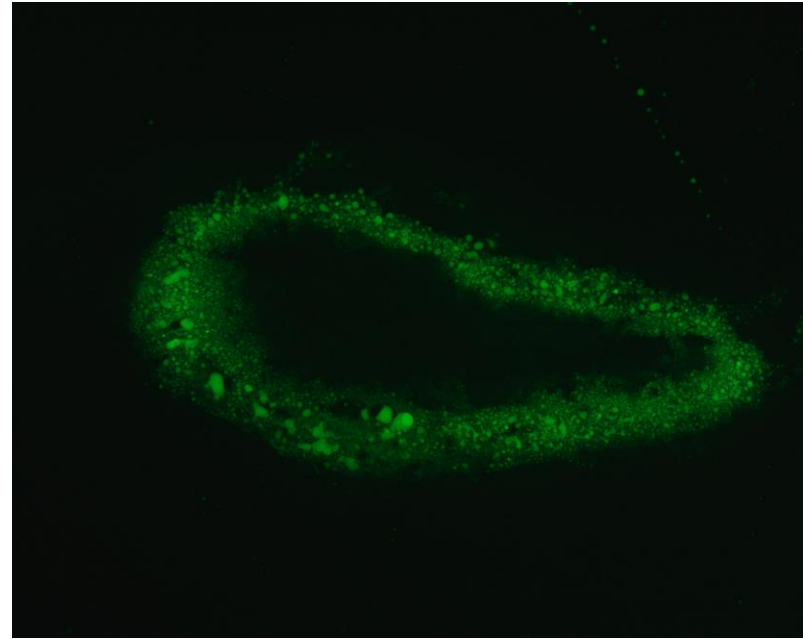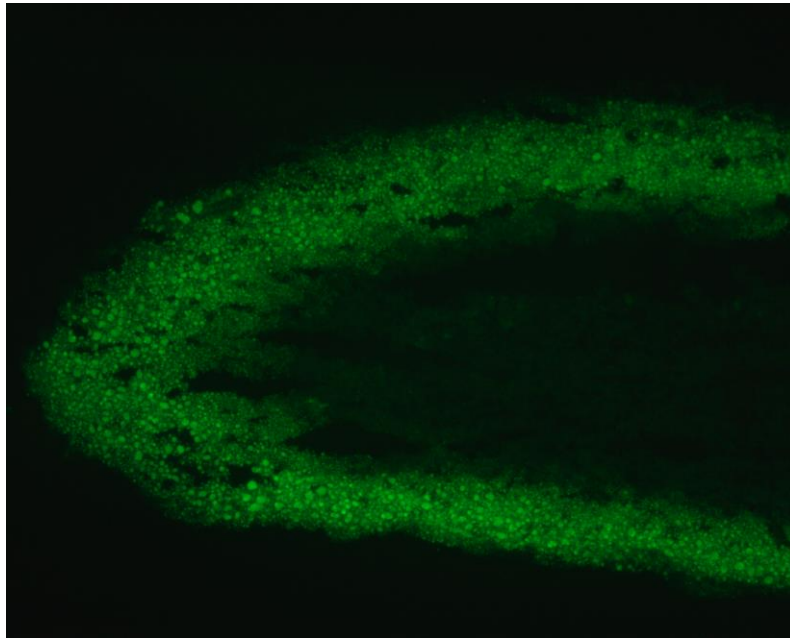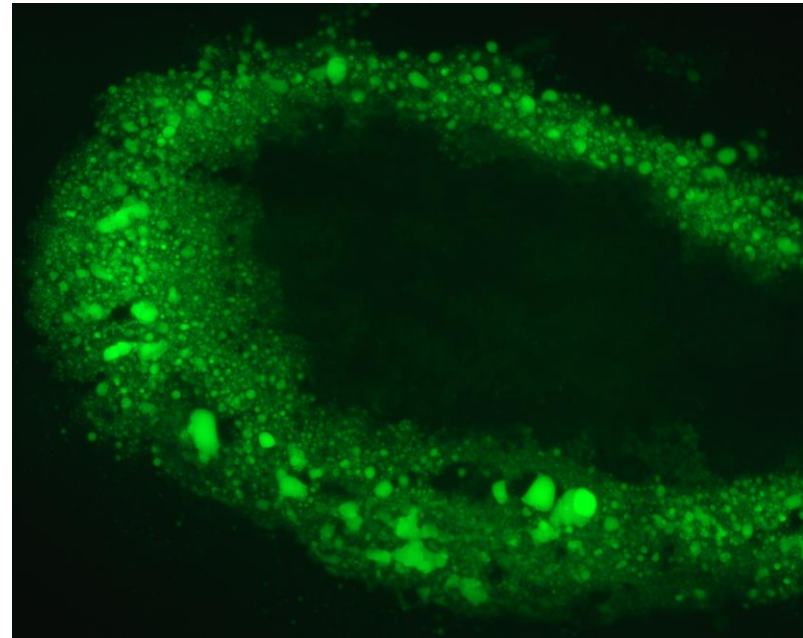

# Flow cytometry

Figure 1d

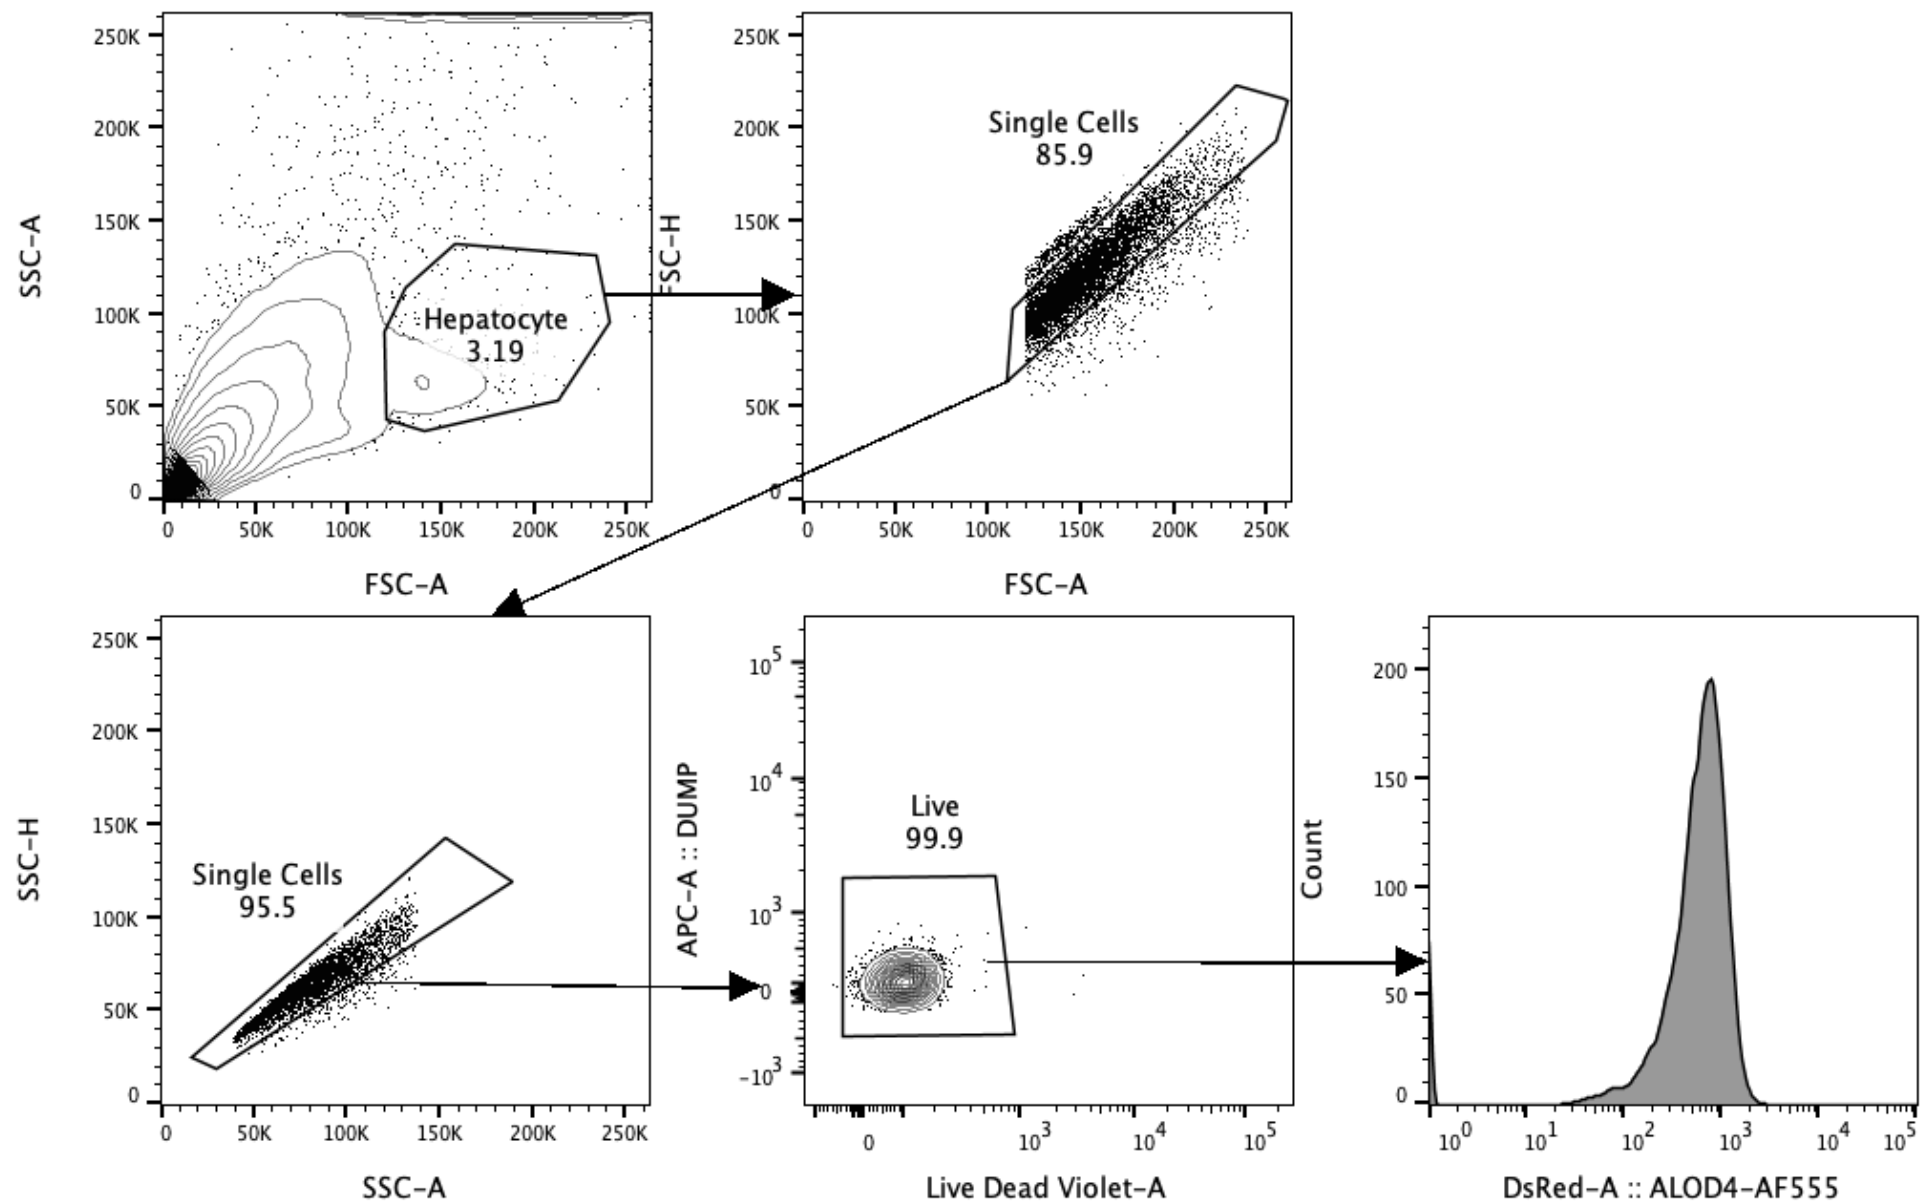

Supplement: NIHMS1875076-supplement-primary_gels.pdf [file NIHMS1875076-supplement-primary_gels.pdf]
