# Supplementary material
Source: PubMed Central journal article supplement (PMC9995220)
Supplement: NIHMS1875076-supplement-Extended_data_tables.pdf [file NIHMS1875076-supplement-Extended_data_tables.pdf]

**Extended data table S1: Antibodies used in this study.**

| Protein        | Source                    | Catalog ID |
|----------------|---------------------------|------------|
| HA-Tag (C29F4) | Cell Signaling Technology | 3724S      |
| His-Tag (27E8) | Cell Signaling Technology | 2366S      |
| HMGCR          | Millipore-Sigma           | ABS229     |
| FDPS           | Abcam                     | ab153805   |
| LDLR           | Cayman Chemical           | 10007665   |
| SQLE           | Millipore-Sigma           | AV42101    |
| CALNEXIN       | Abcam                     | ab10286    |
| APOB           | Millipore-Sigma           | AB742      |
| APOA1          | Meridian                  | K23500R    |
| SR-B1          | Abcam                     | ab217318   |
| ABCA1          | Novus Biologicals         | NB-400-105 |
| ACTIN          | Millipore-Sigma           | A2066      |
| PAN-CADHERIN   | Santa Cruz                | sc-59876   |
| ATGL           | Cell Signaling Technology | 2138S      |
| SREBP-2        | Millipore-Sigma           | MABS1988MI |
| LAMIN A/C      | Santa Cruz                | sc-6215    |
| SMPD3          | Abcam                     | ab85017    |
| E-CADHERIN     | BD Biosciences            | 610181     |

**Extended data table S2. Primer sequences used in this study.**

| qPCR primers | Forward                      | Reverse                     |
|--------------|------------------------------|-----------------------------|
| mAster-A     | CAGCAGATGCTCTTCTCGGA         | TCTGAGGATACACGAAGCCG        |
| mAster-B     | TCCAATGCCATCCAAGTC           | ACAAAGTGCCAGAGCTCC          |
| mAster-C     | CCGTGTCTTTCACATCAGTGC        | ACTTCCCAGTTAGCGGGTTG        |
| mSREBP2      | ACCTAGACCTCGCCAAAGGT         | GCACGGATAAGCAGGTTTGT        |
| mHMGCR       | CTTGTGGAATGCCTTGTGATT        | AGCCGAAGCAGCACATGAT         |
| mHMGCS       | GCC GTG AAC TGG GTC GAA      | GCA TAT ATA GCA ATG TCT CCT |
| mLDLR        | AGGCTGTGGGCTCCATAGG          | TGC GGT CCA GGG TCA TCT     |
| mSQLE        | GCCTCTCAGAATGGTCTGTCT        | CGCATGTCCCAGAATAAGGA        |
| mInsig1      | CACGCCAGTGCCAAATTAGA         | CCCAAGGCCGCTTCG             |
| mSrepb1c     | GGAGCCATGGATTGCACATT         | GGCCCGGAAGTCACTGT           |
| mAbca1       | GGTTTGGAGATGGTTATACAATAGTTGT | TTCCCGGAAACGCAAGTC          |
| mAbcg1       | AGGTCTCAGCCTTCTAAAGTTCCTC    | TCTCTCGAAGTGAATGAAATTTATCG  |
| mSr-b1       | TCCTGGGAGCCCTTTTACT          | GCCCATCATCTGCCAACT          |
| mBesp        | CCTTGGTAGAGAAGAGGCGACA       | ATGGCTACCCTTTGCTTCTGCC      |
| mMafg        | TCAAGCGGGTGACACAGAAGGA       | CCAGCTTCATGCTGGCATTCTC      |
| mCyp7a1      | CACCATTCTGCAACCTTCTGG        | ATGGCATTCCCTCCAGAGCTGA      |
| mSmpd1       | AACTCTGAGCCGACCACTAGCT       | GTCCAGGACCACATGAGAGCTT      |
| mSmpd2       | TGCCTGCTGAAAGAGTGGACAG       | TGGCTGACGTAGCAGTTCTTGG      |
| mSmpd3       | TCAACAGCGGTCTCTTCTTCGC       | CTTTGGTCTGAGGTGTGCTTC       |
| mSmpd4       | AGCCTCGCTTTGTCCAGCAGAA       | TGCAGGTAGCTCAGCCACATCT      |

| Genotyping primers              | Forward                  | Reverse                  |
|---------------------------------|--------------------------|--------------------------|
| Aster-A flox/flox               | AAGACATCATAGTTTCGGGAAGC  | CGTCTAGCTCTGAACCTCAAGAC  |
| Aster-B flox/flox               | AAAGTGTGTTGGTTAACTCTTGGG | GTTTACAGTCCTAGCCCAAACATC |
| Aster-C flox/flox               | AATGCTGTTTGAGTTGCTGA     | GACAAGCAAATATGCACGTGTT   |
| 3xHA-Aster-C                    | attaattgccgccagaggacgc   | taacactccgtcgcttagccag   |
| mFxr KO                         | gctctaaggagagtcactgtgca  | gcatgctctgtcataaacgccat  |
| Cre genotyping                  | GCGGTCTGGCAGTAAAACTATC   | GTGAAACAGCATTGCTGTCACTT  |
| Cre internal control genotyping | CTAGGCCACAGAATTGAAAGATCT | GTAGGTGGAATTCTAGCATCATCC |
